# Supplementary material for: Hypoxia truncates and constitutively activates the key cholesterol synthesis enzyme squalene monooxygenase
Source: eLife journal article supplement (doi:10.7554/elife.82843), 2022-12-13

**Figure 1B – SM**

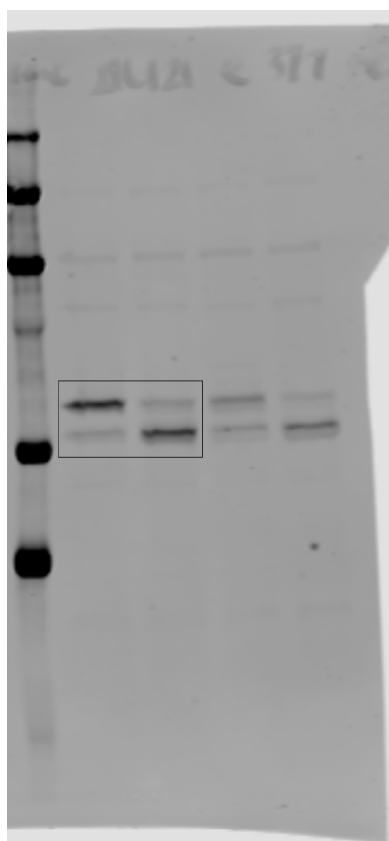

**Figure 1B – HIF1 $\alpha$**

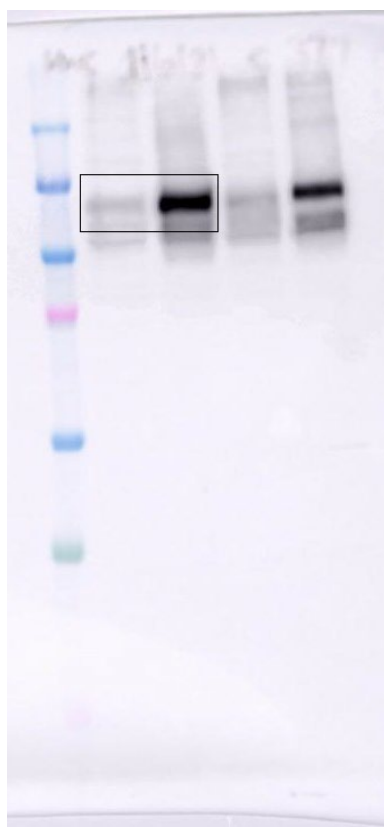

**Figure 1B – GAPDH**

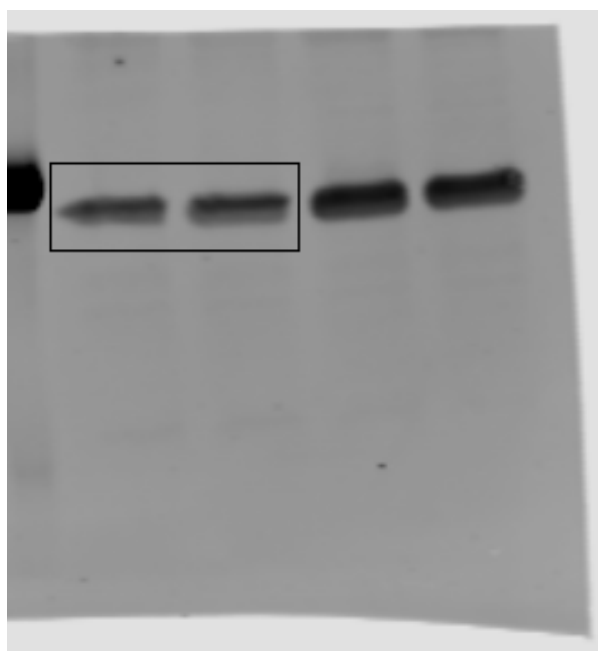

**Figure 1C – SM**

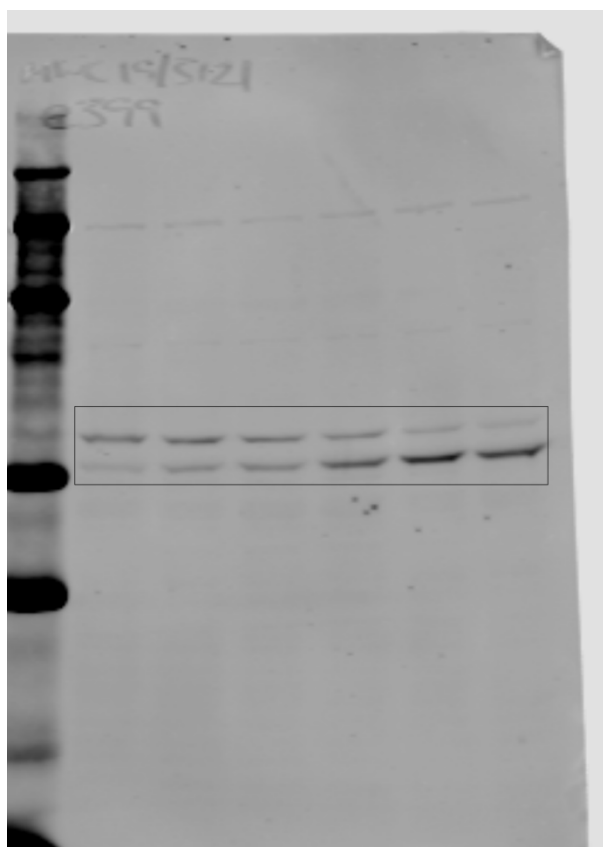

**Figure 1C – HIF1 $\alpha$**

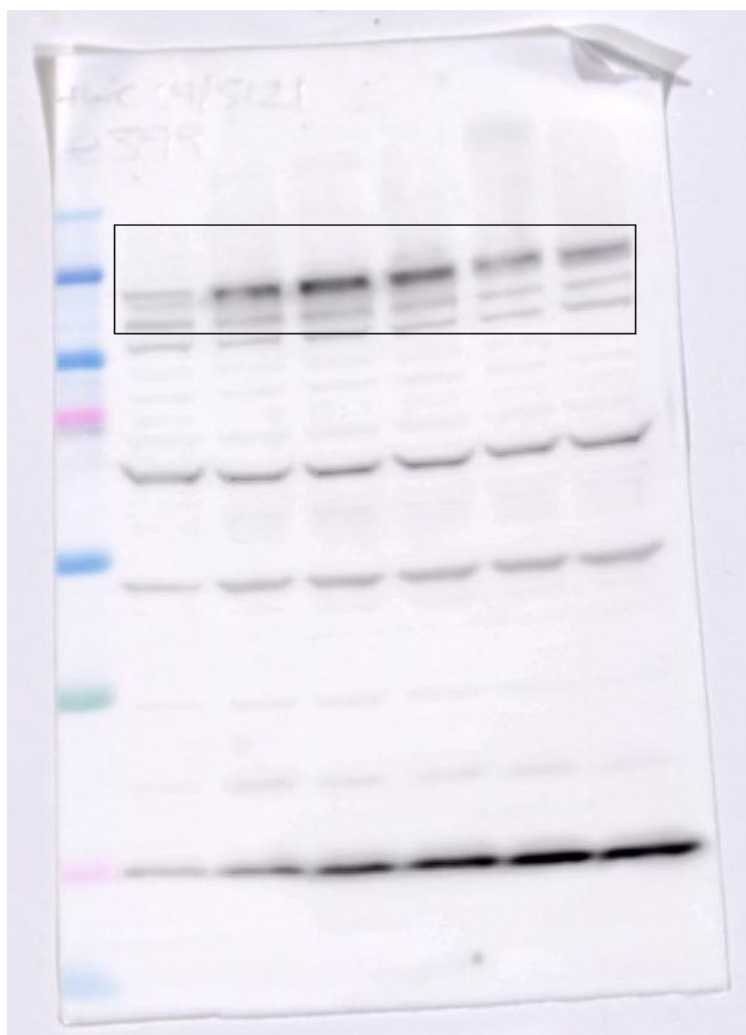

**Figure 1C – GAPDH**

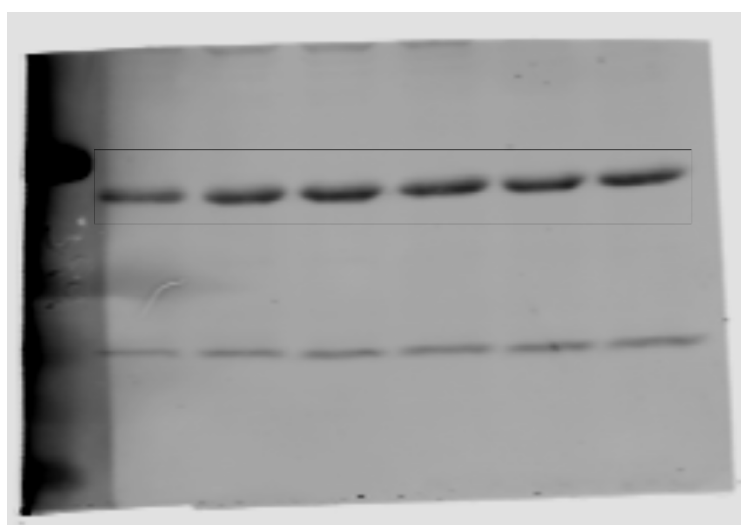

Figure 1D – 0.5% O<sub>2</sub> – SM

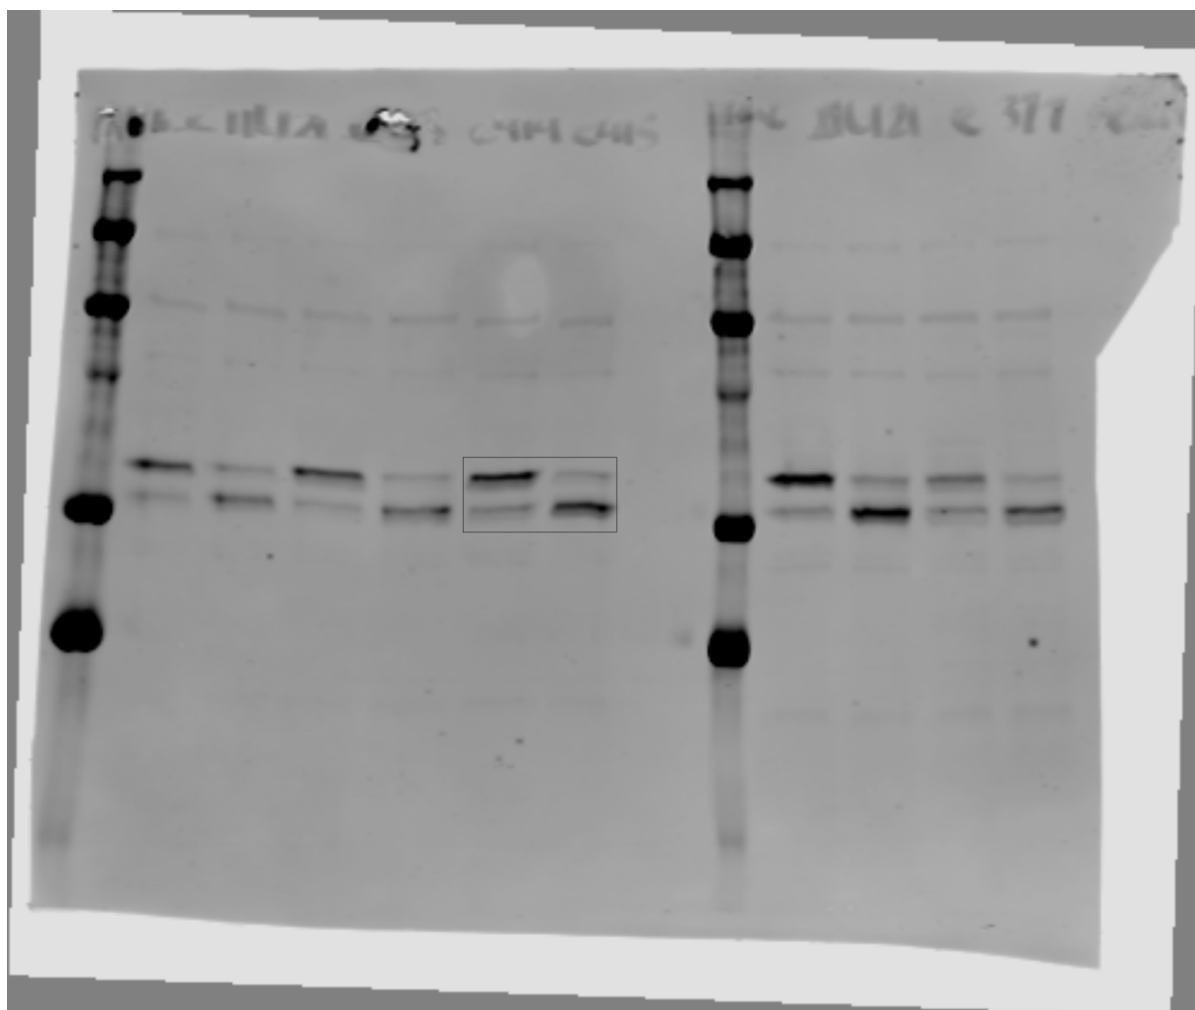

Figure 1D – 0.5% O<sub>2</sub> – HIF1α

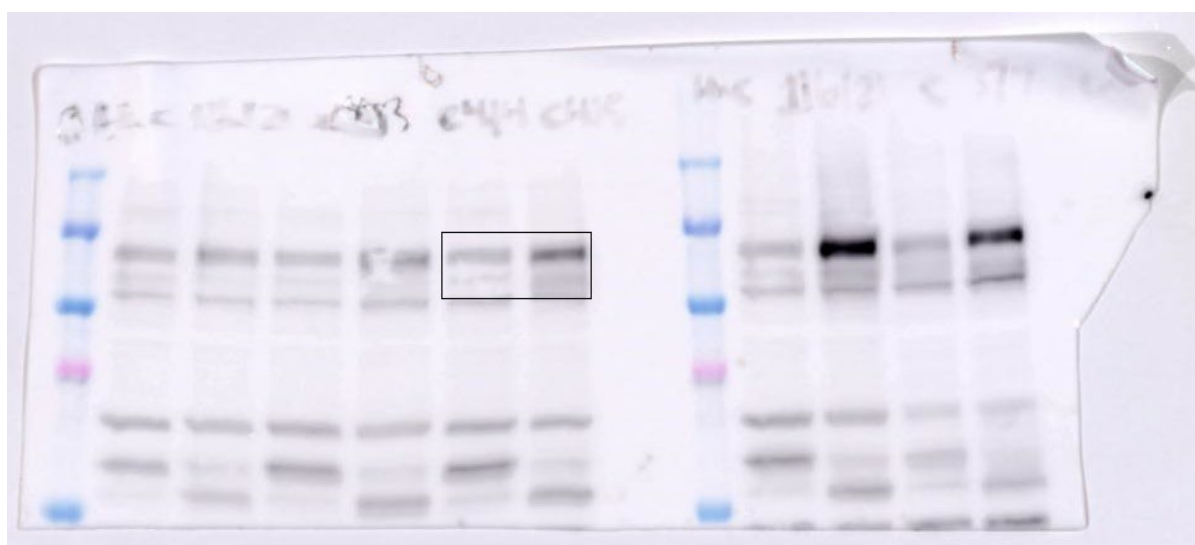

**Figure 1D – 0.5% O<sub>2</sub> – GAPDH**

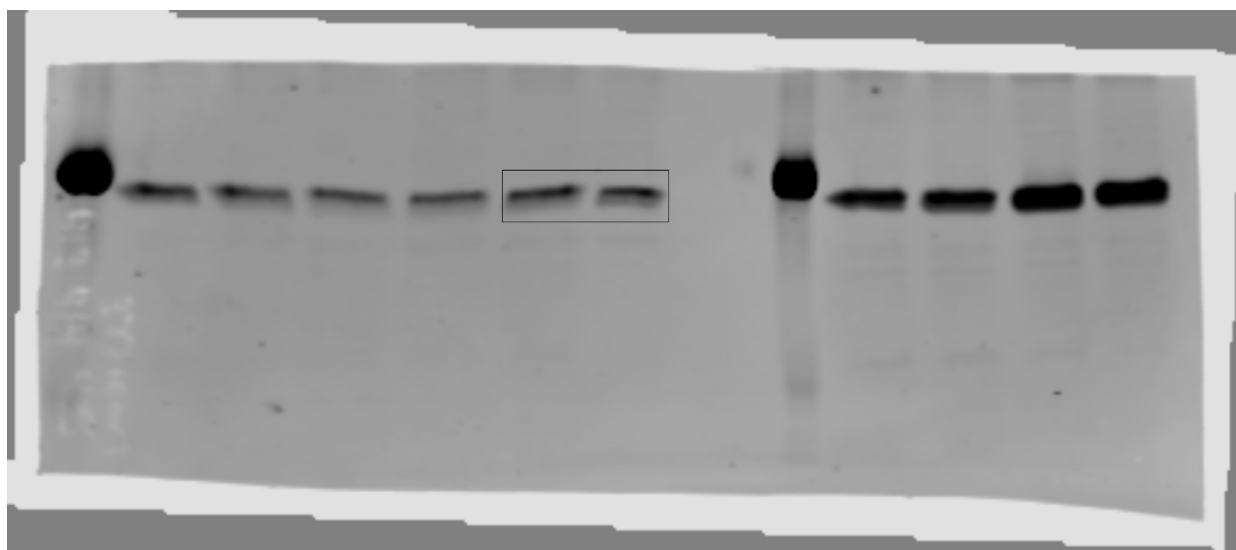

**Figure 1D – 1% O<sub>2</sub> – SM**

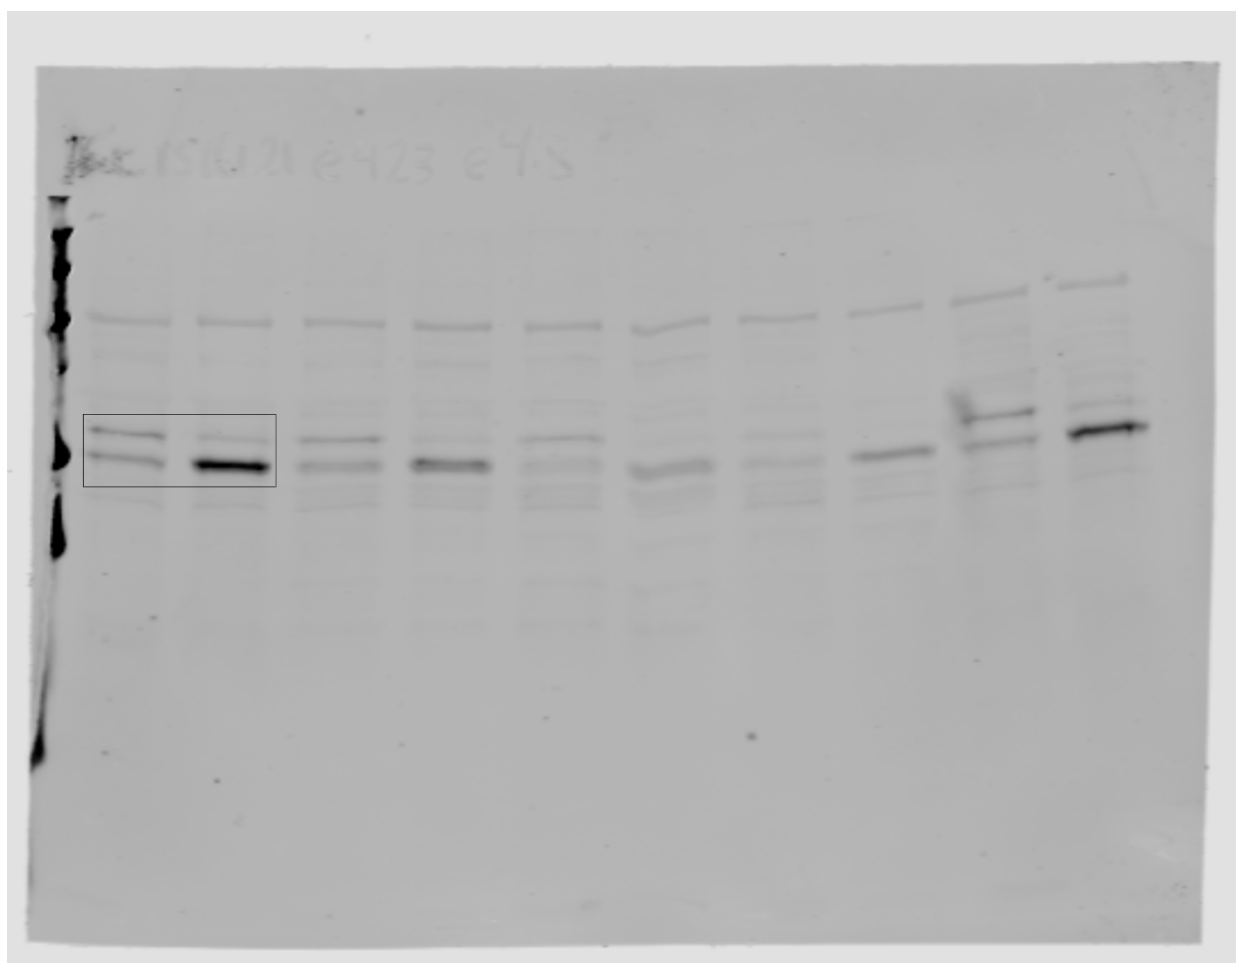

**Figure 1D – 1% O<sub>2</sub> – HIF1 $\alpha$**

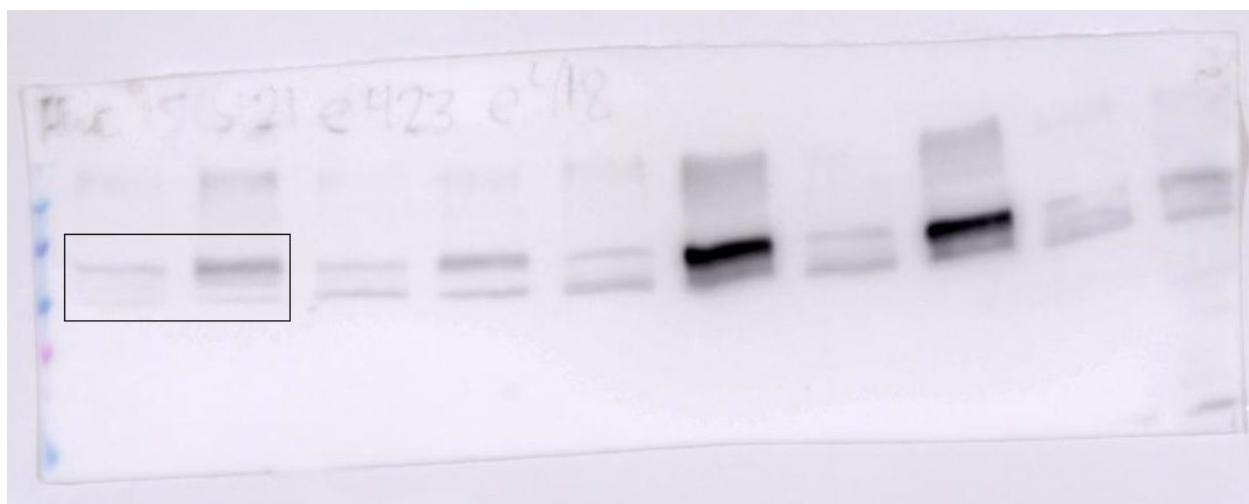

**Figure 1D – 1% O<sub>2</sub> – GAPDH**

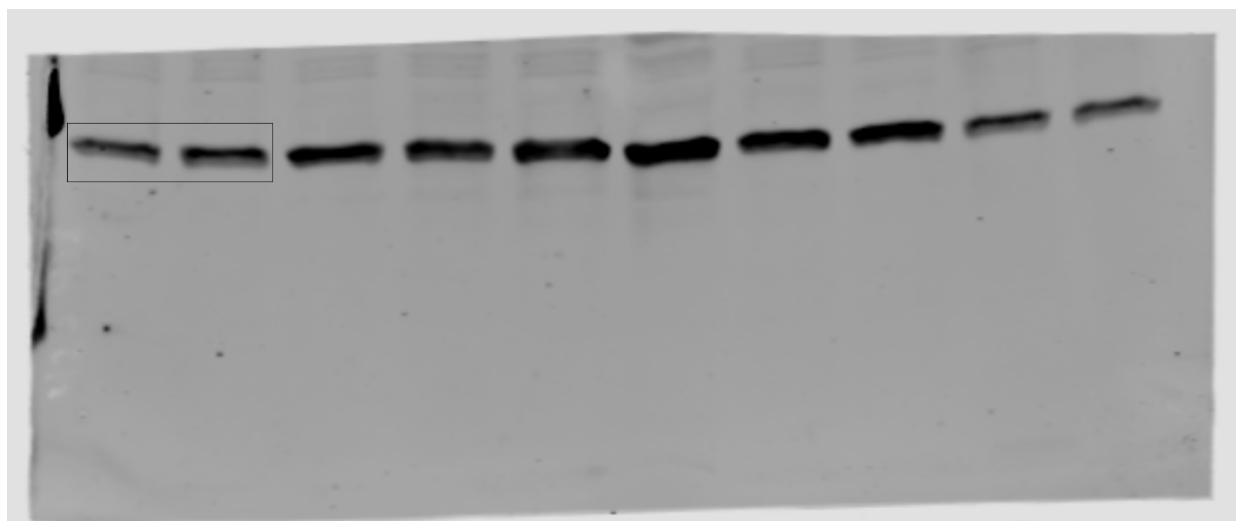

**Figure 1D – 2% O<sub>2</sub> – SM**

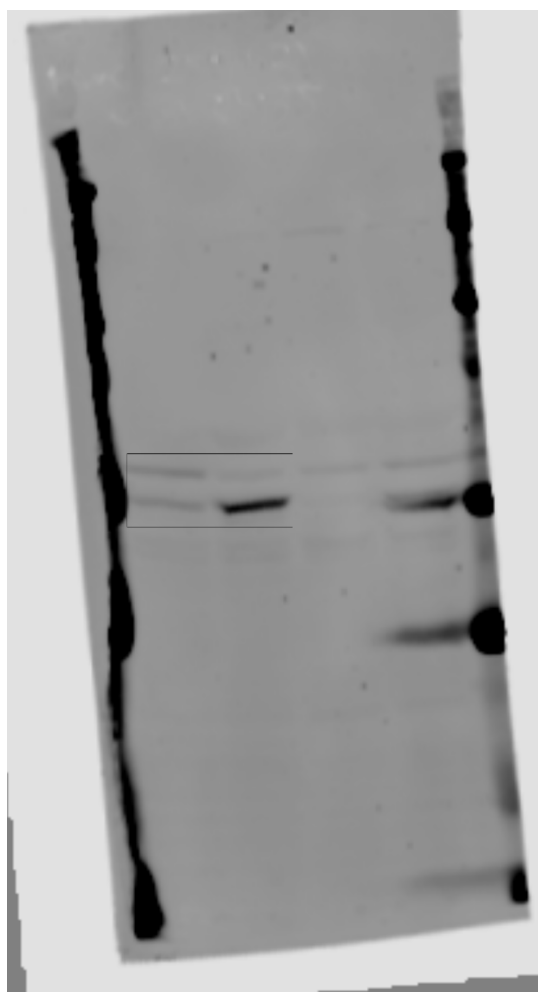

**Figure 1D – 2% O<sub>2</sub> – HIF1 $\alpha$**

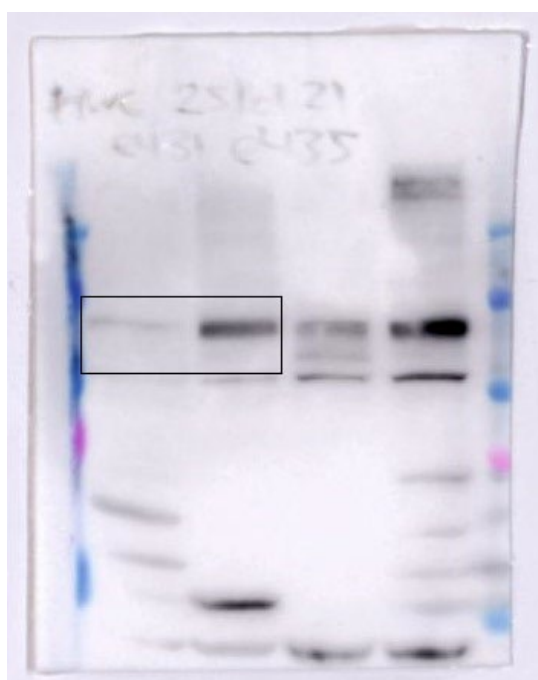

Figure 1D – 2% O<sub>2</sub> – GAPDH

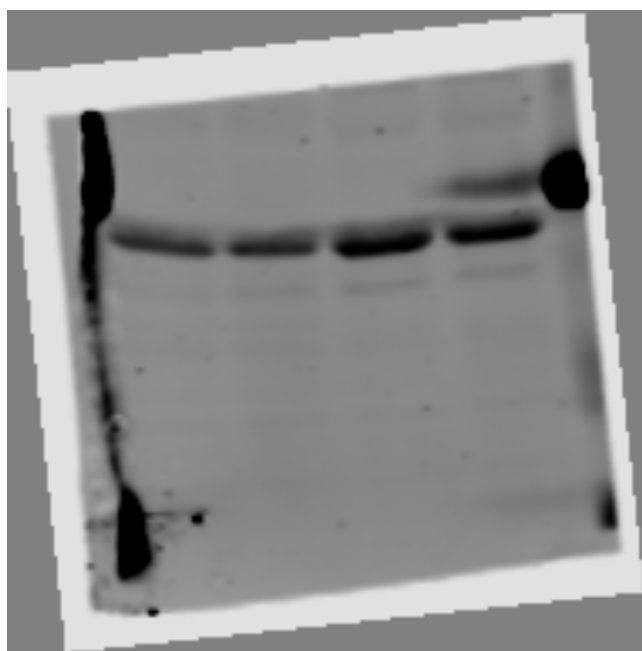

Figure 1D – 3% O<sub>2</sub> – SM

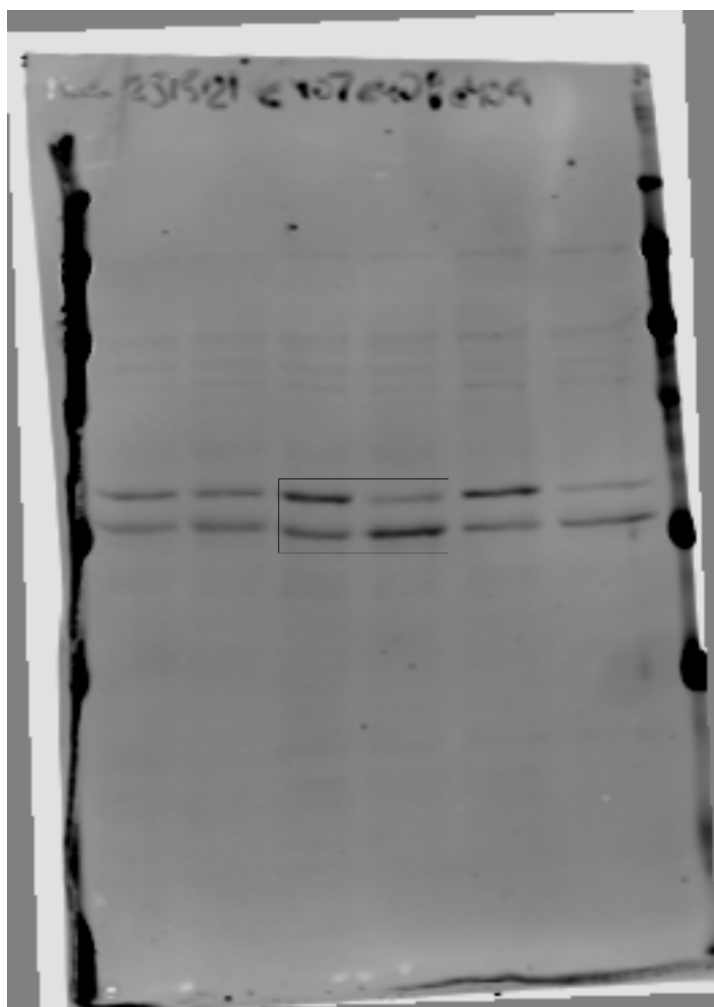

**Figure 1D – 3% O<sub>2</sub> – HIF1 $\alpha$**

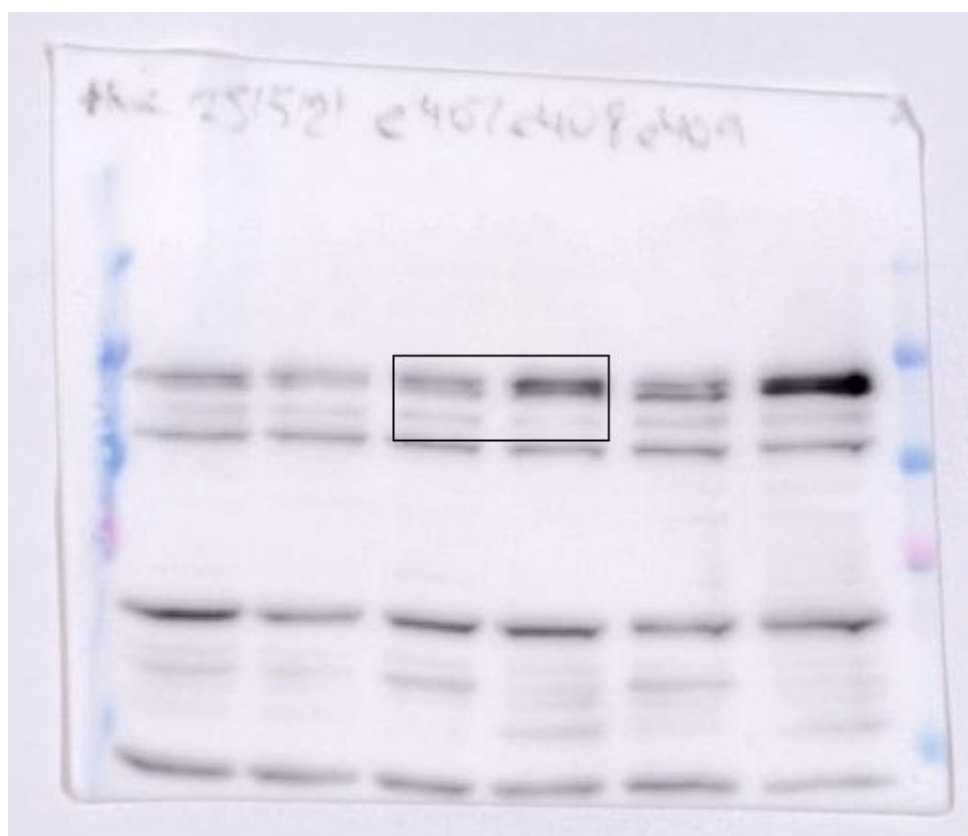

**Figure 1D – 3% O<sub>2</sub> – GAPDH**

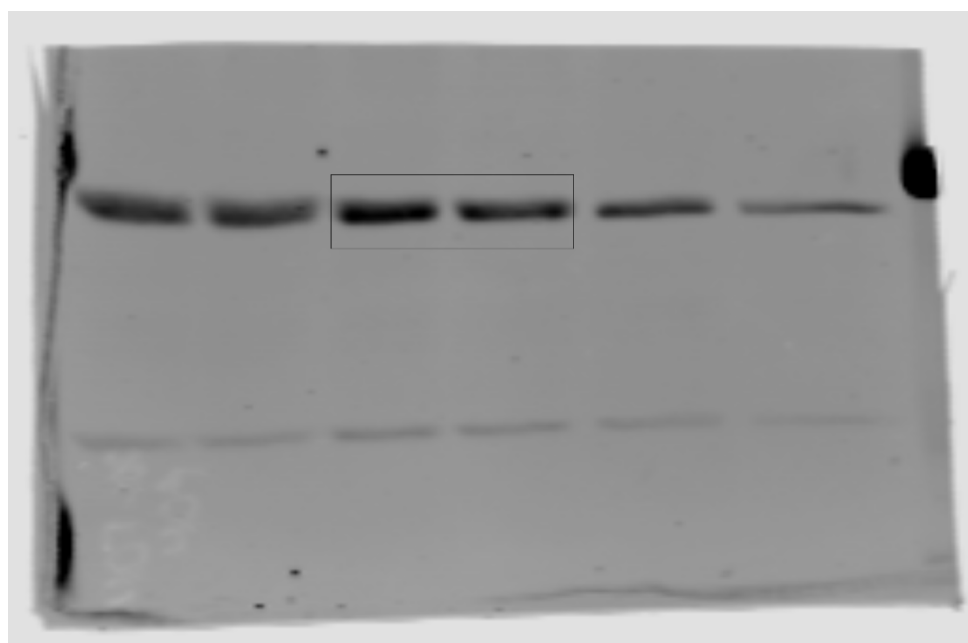

**Figure 1D – 4% O<sub>2</sub> – SM**

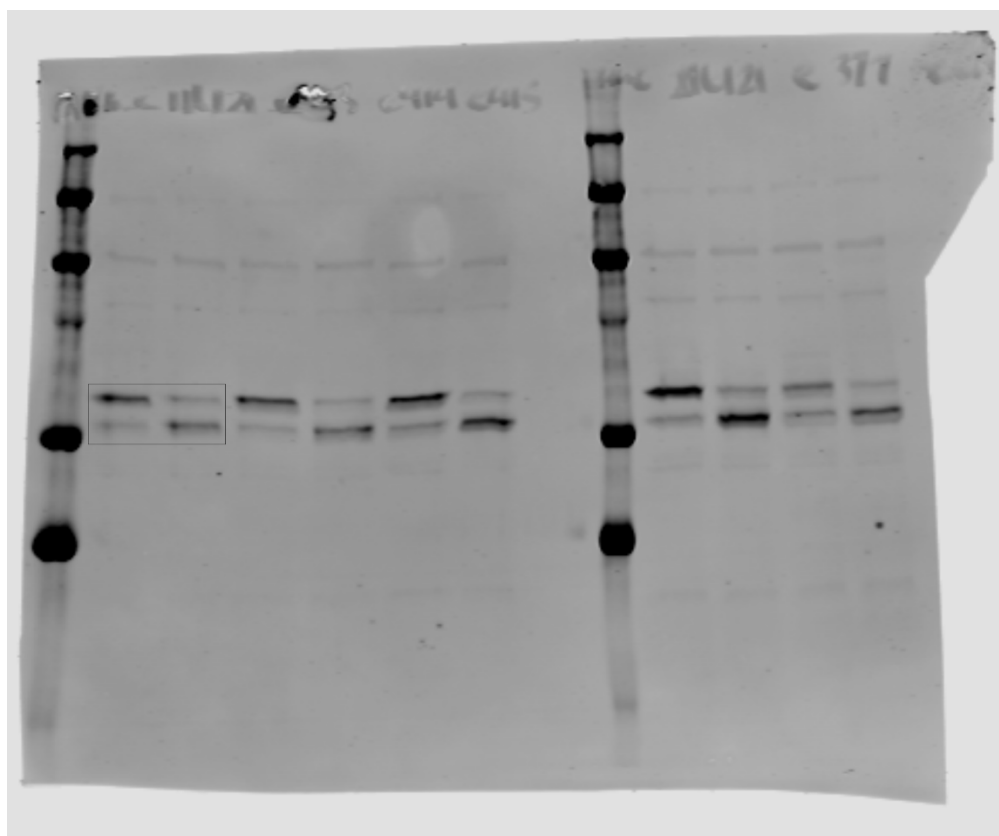

**Figure 1D – 4% O<sub>2</sub> – HIF1 $\alpha$**

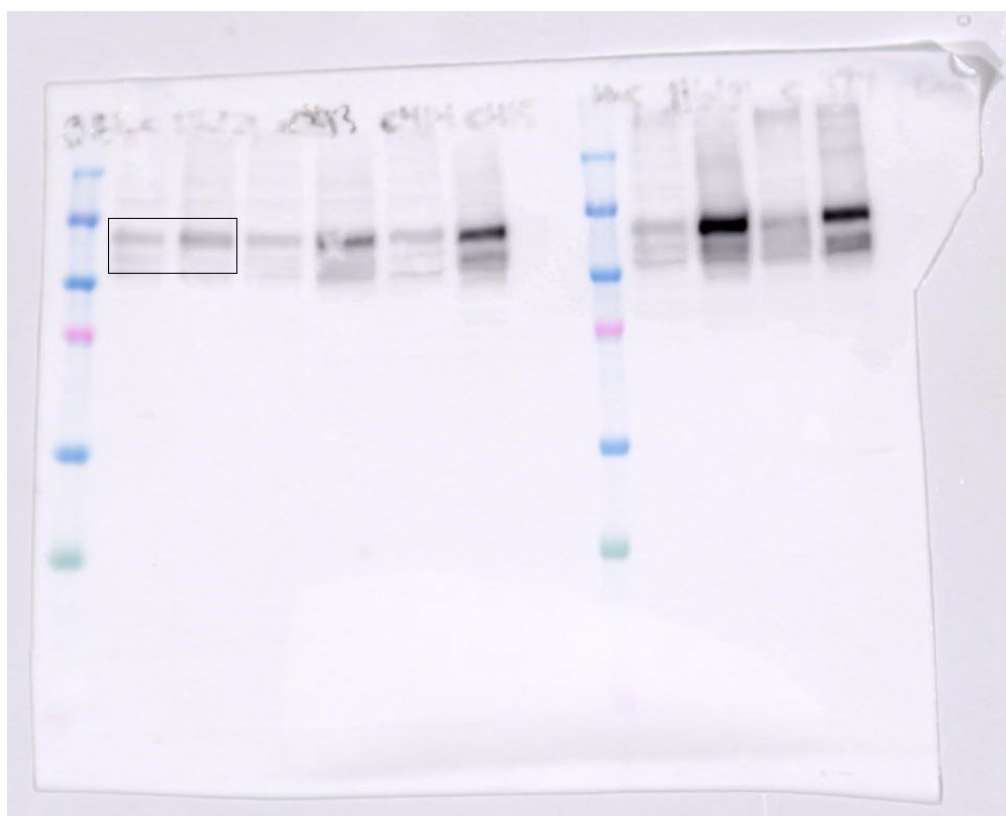

Figure 1D – 4% O<sub>2</sub> – GAPDH

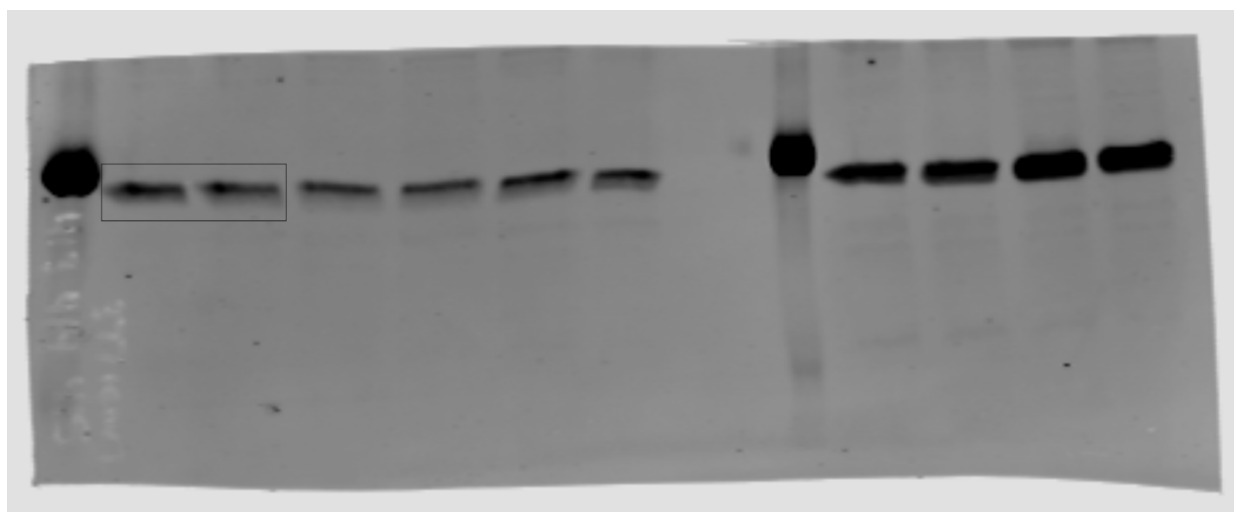

Figure 1D – 5% O<sub>2</sub> – SM

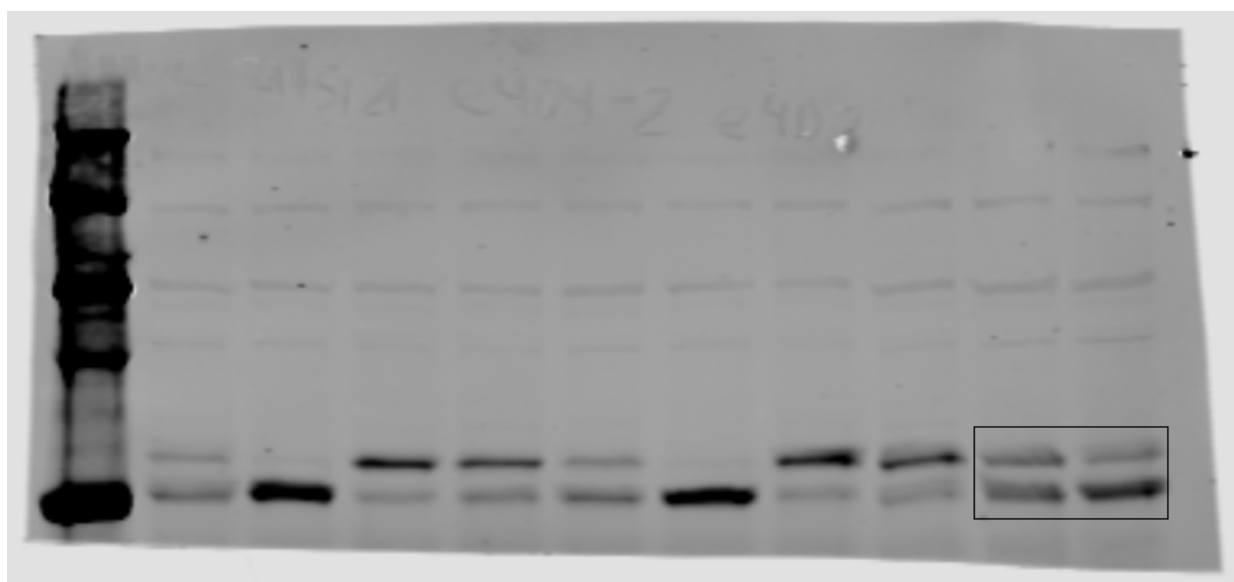

**Figure 1D – 5% O<sub>2</sub> – HIF1α**

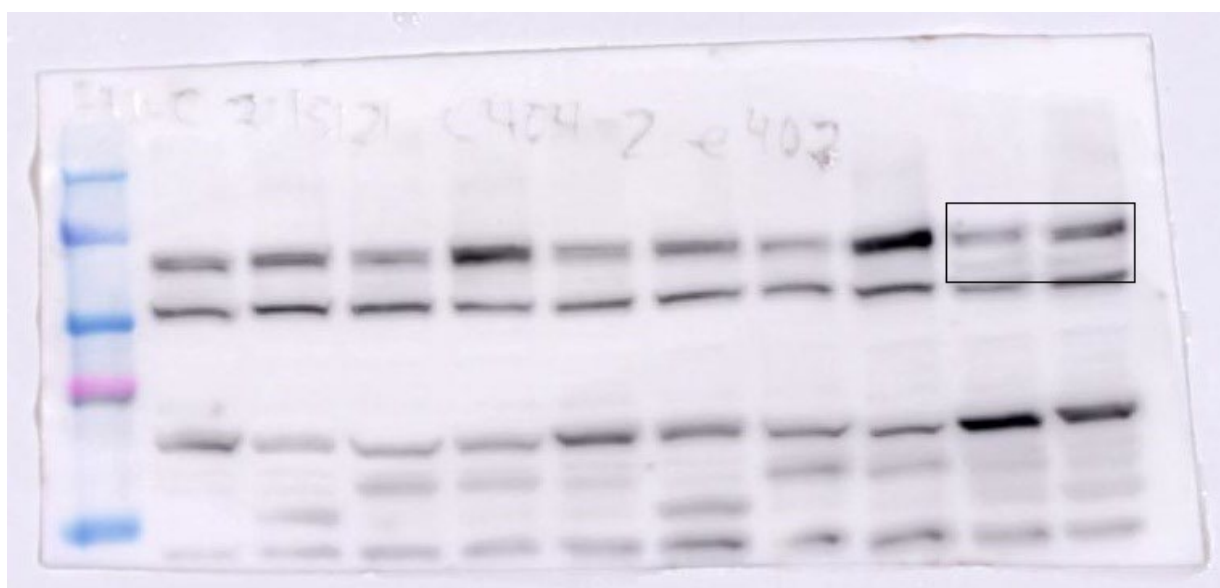

**Figure 1D – 5% O<sub>2</sub> – GAPDH**

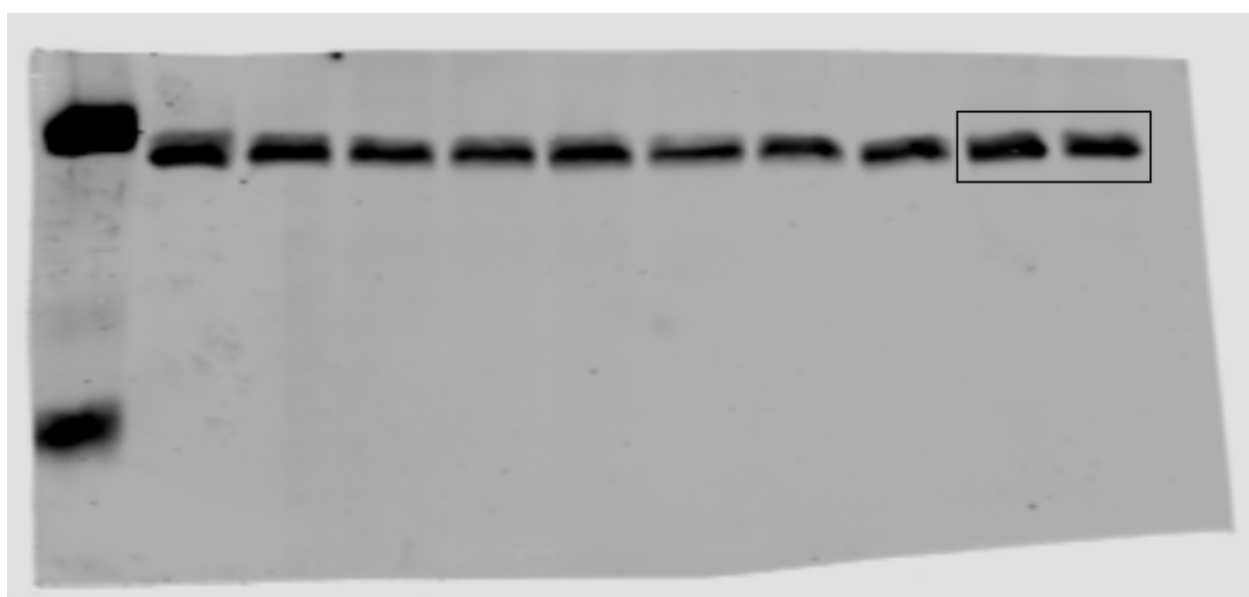

**Figure 1D – 10% O<sub>2</sub> – SM**

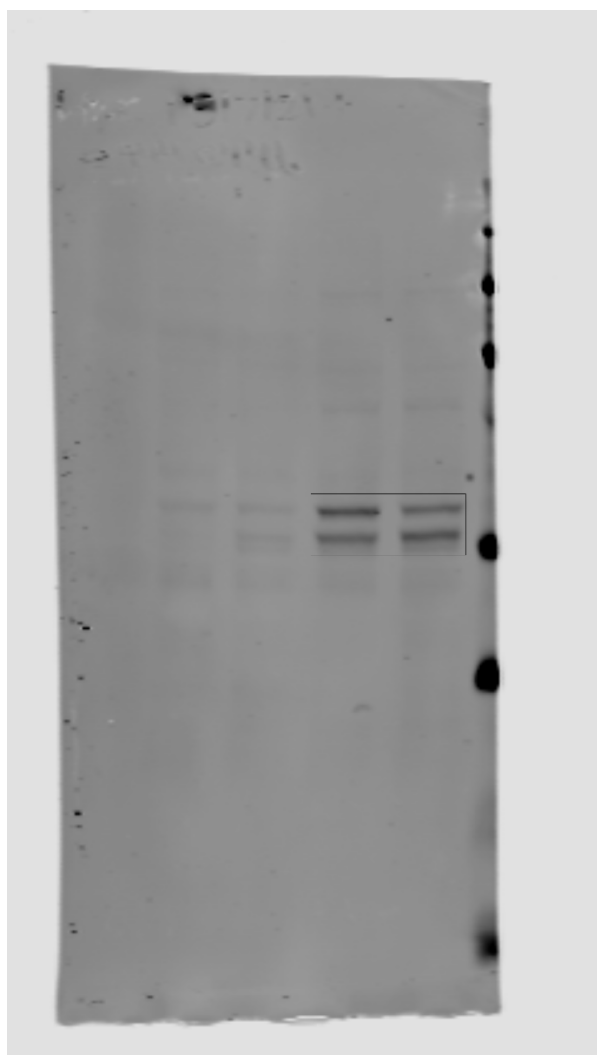

**Figure 1D – 10% O<sub>2</sub> – HIF1 $\alpha$**

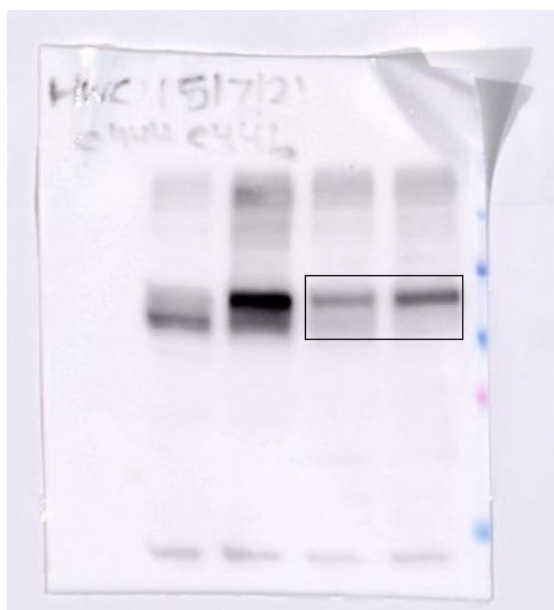

**Figure 1D – 10% O<sub>2</sub> – GAPDH**

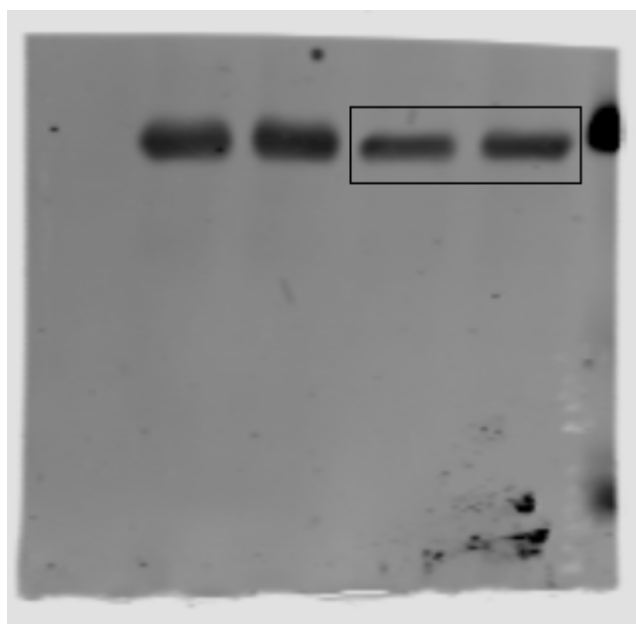

Supplement: fig1-data1 [file elife-82843-fig1-data1-v1.zip]
