# Supplementary material for: Hypoxia truncates and constitutively activates the key cholesterol synthesis enzyme squalene monooxygenase
Source: eLife journal article supplement (doi:10.7554/elife.82843), 2022-12-13

**Figure 1—figure supplement 2E – SM**

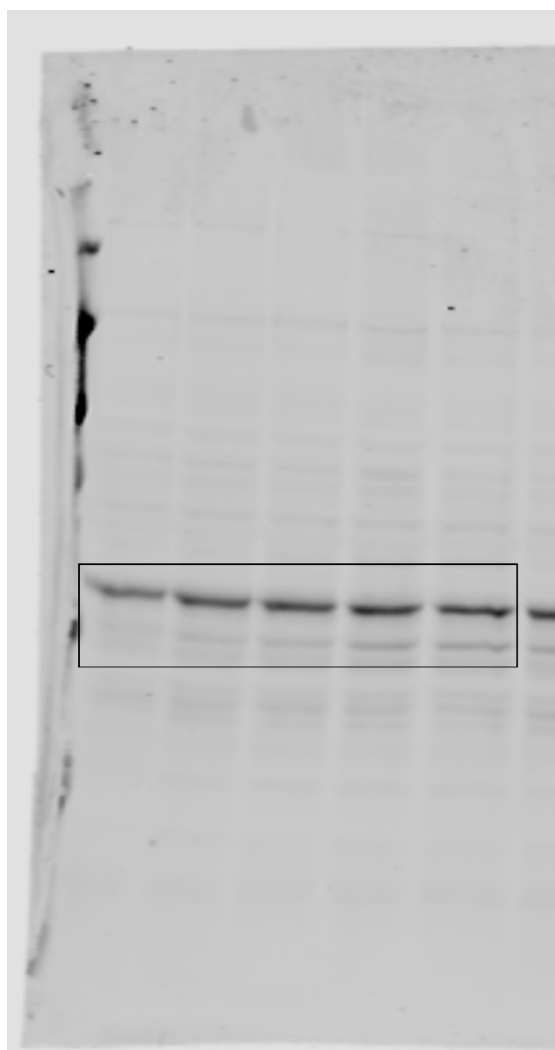

**Figure 1—figure supplement 2E – HIF1 $\alpha$**

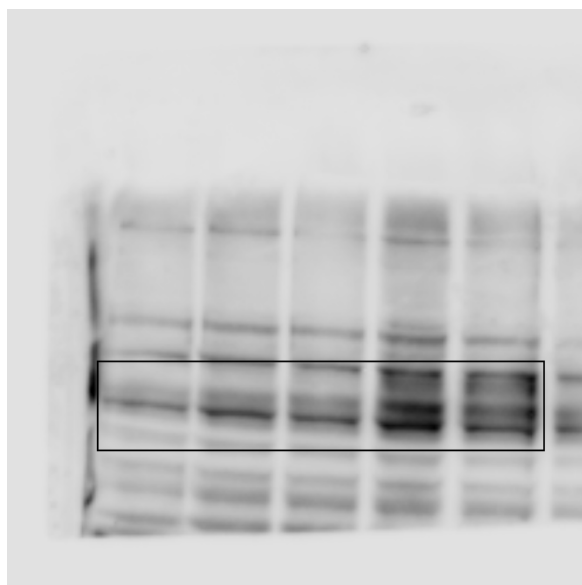

**Figure 1—figure supplement 2E – GAPDH**

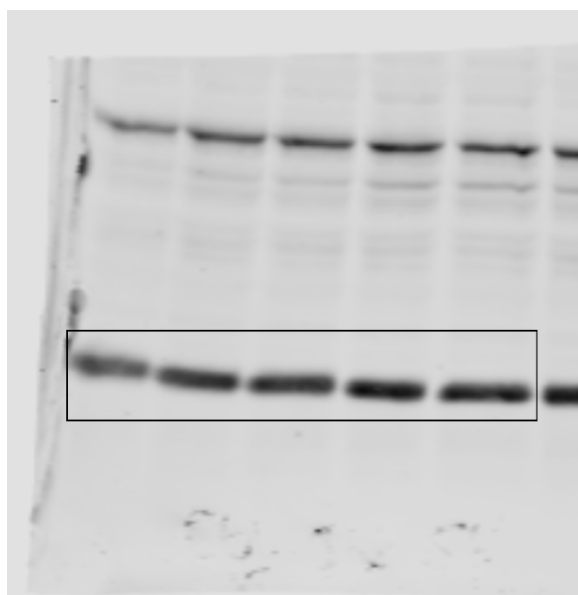

**Figure 1—figure supplement 2F – HCT116 – SM**

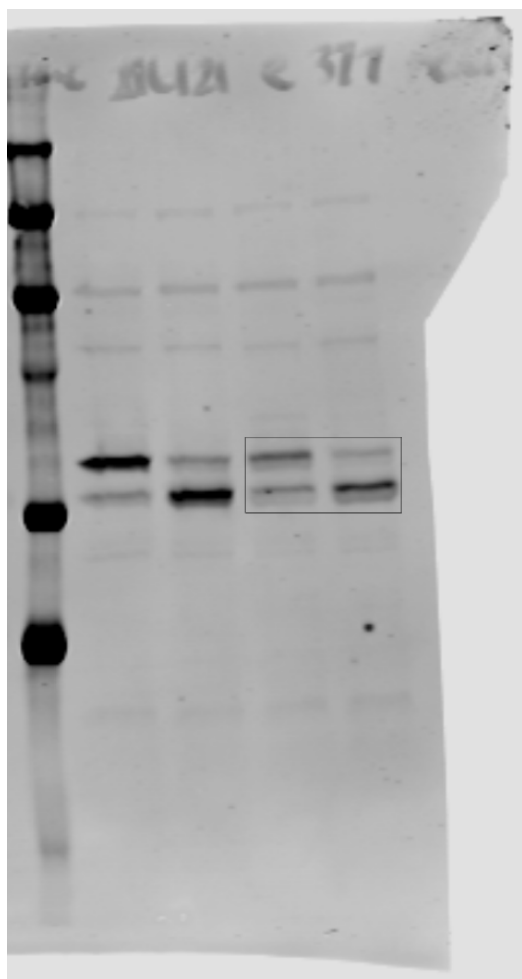

**Figure 1—figure supplement 2F – HCT116 – HIF1 $\alpha$**

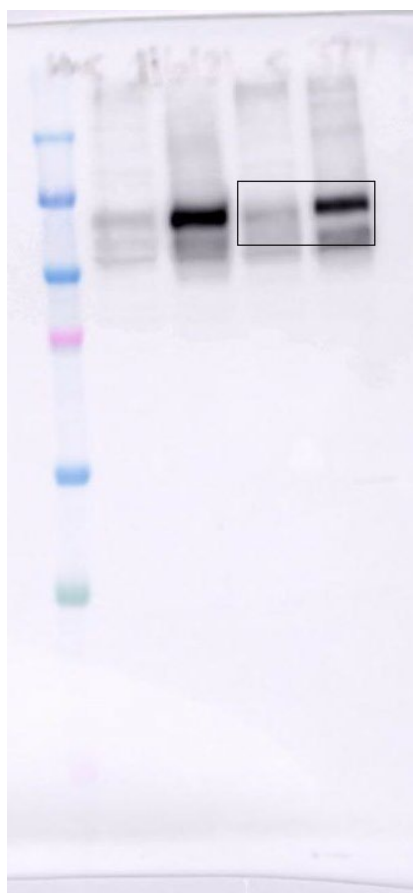

**Figure 1—figure supplement 2F – HCT116 – GAPDH**

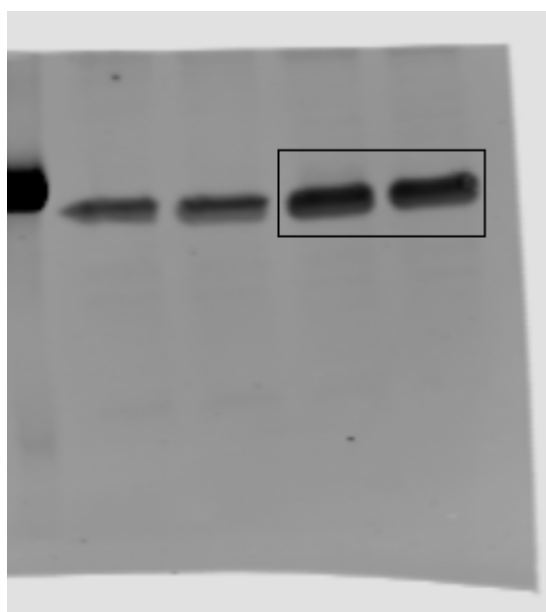

Figure 1—figure supplement 2F – Huh7 – SM

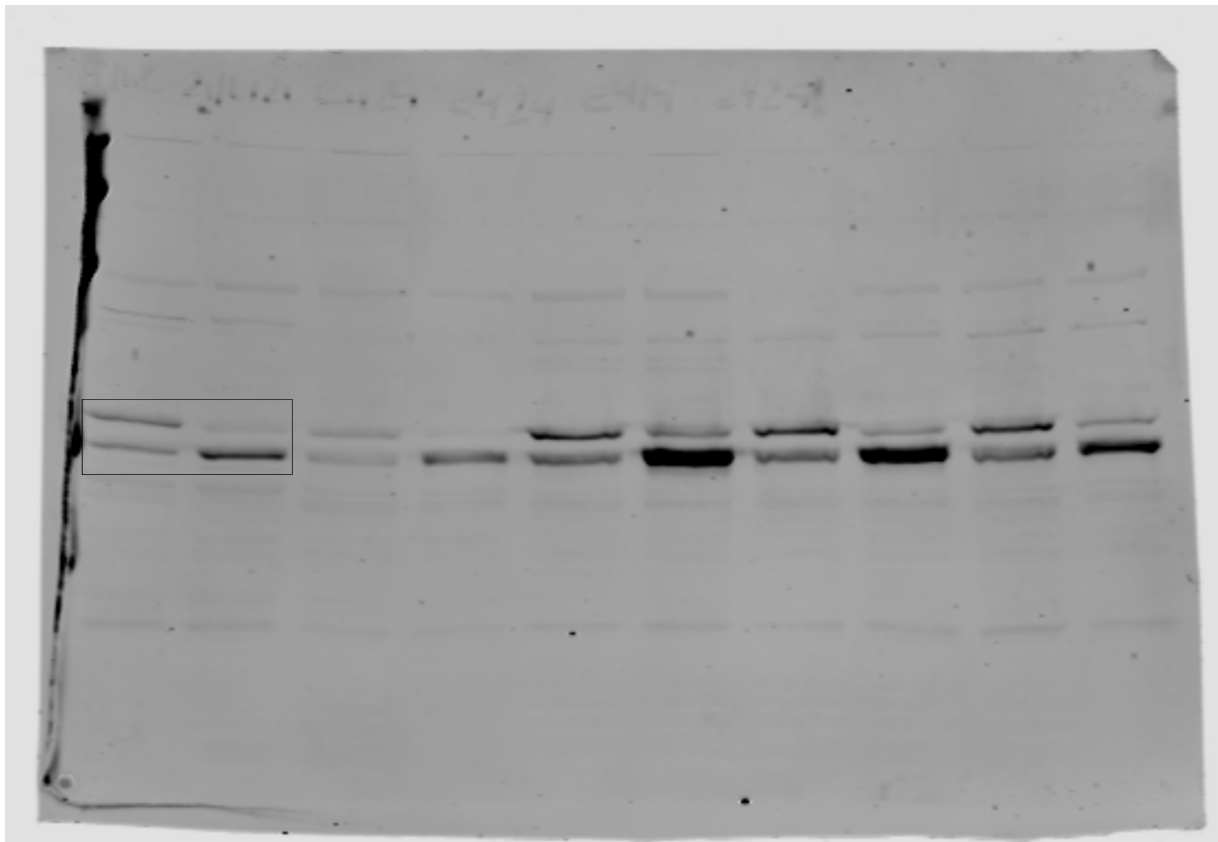

Figure 1—figure supplement 2F – Huh7 – HIF1 $\alpha$

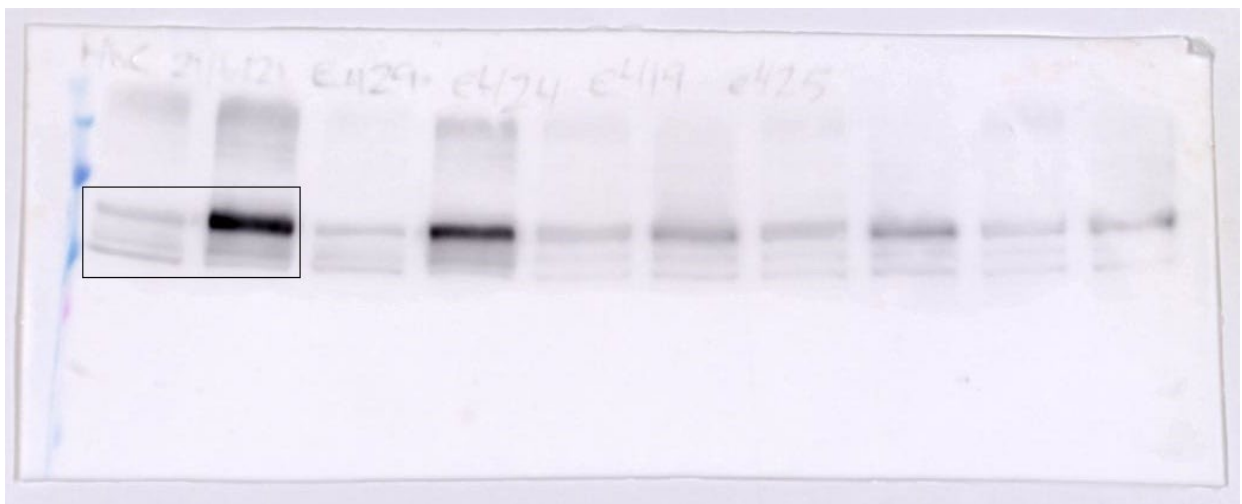

Figure 1—figure supplement 2F – Huh7 – GAPDH

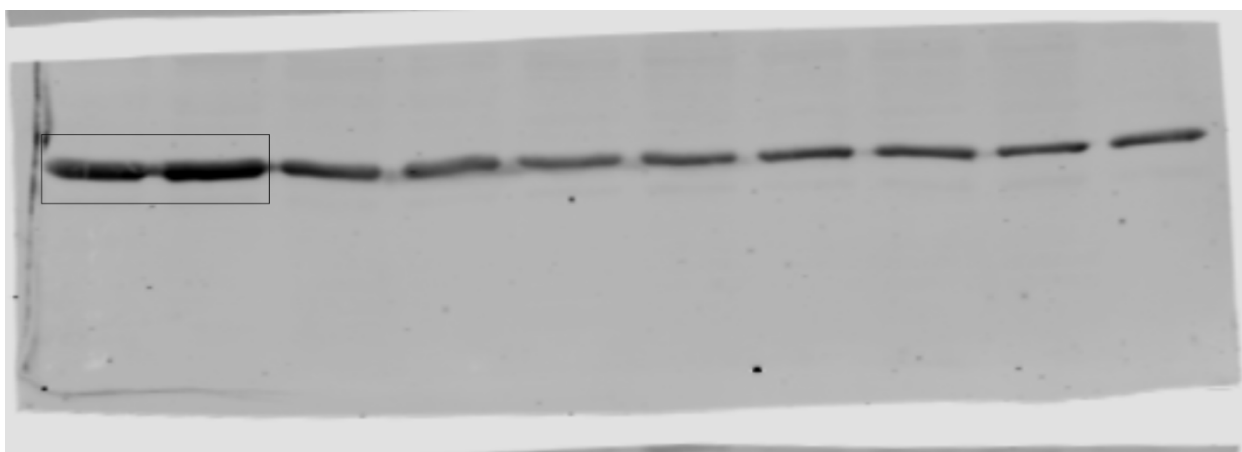

Figure 1—figure supplement 2F – HeLa – SM

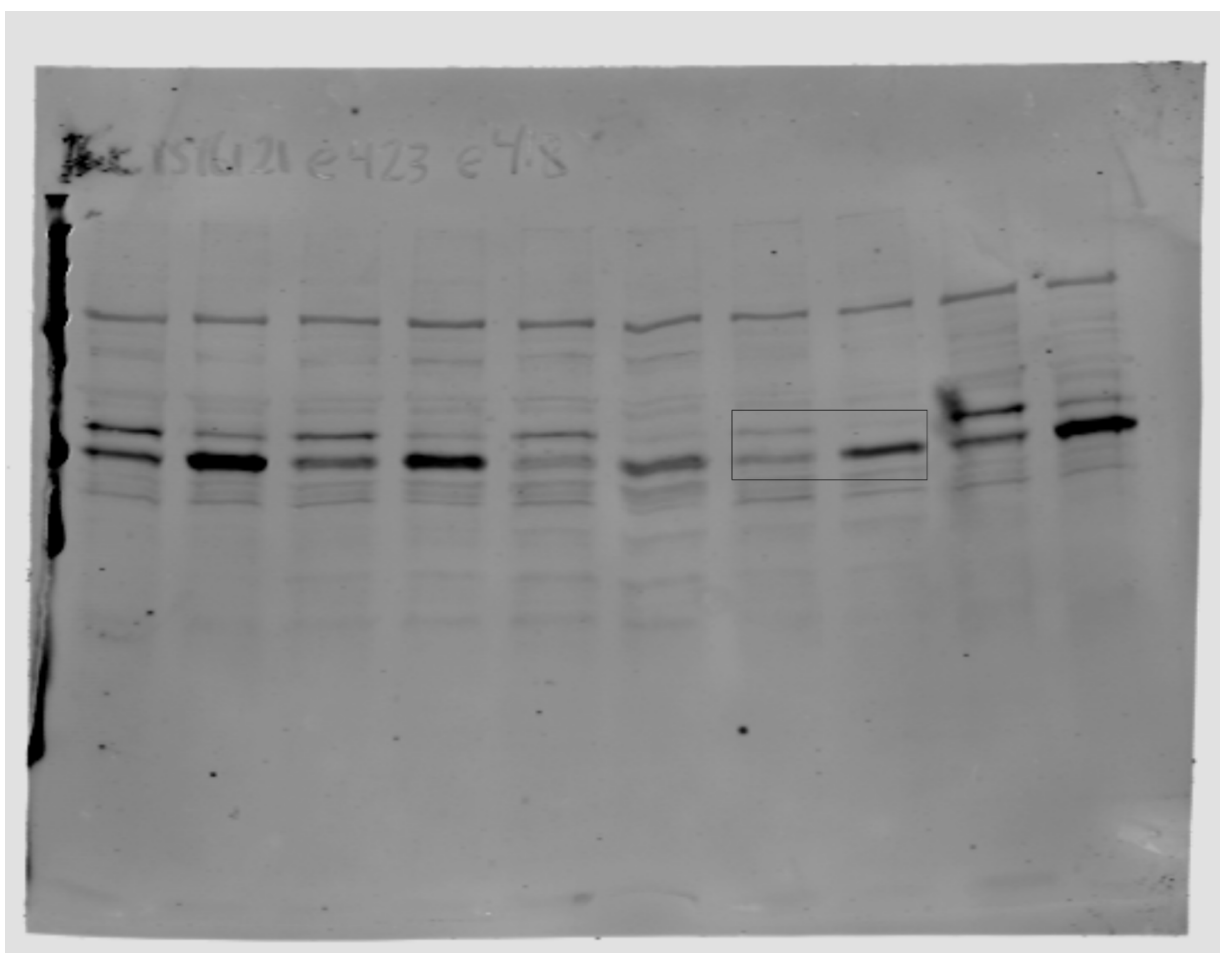

Figure 1—figure supplement 2F – HeLa – HIF1 $\alpha$

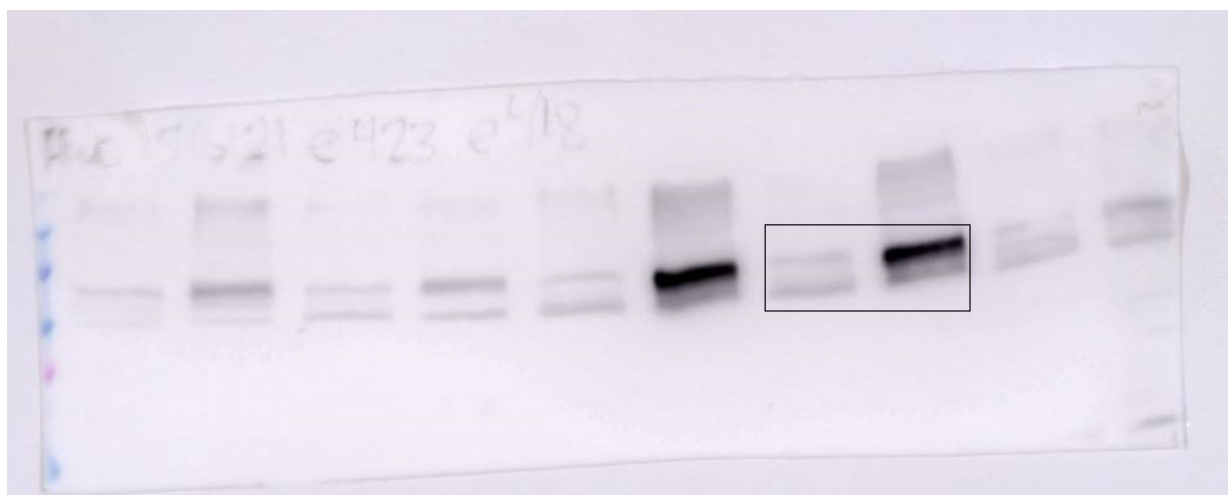

Figure 1—figure supplement 2F – HeLa – GAPDH

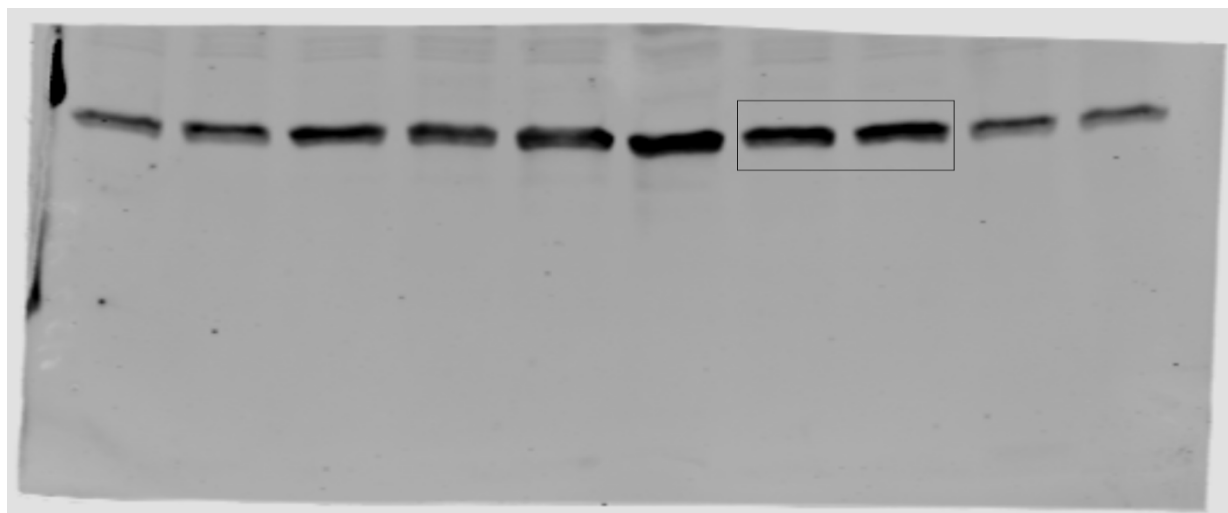

Figure 1—figure supplement 2F – MDA-MB-231 – SM

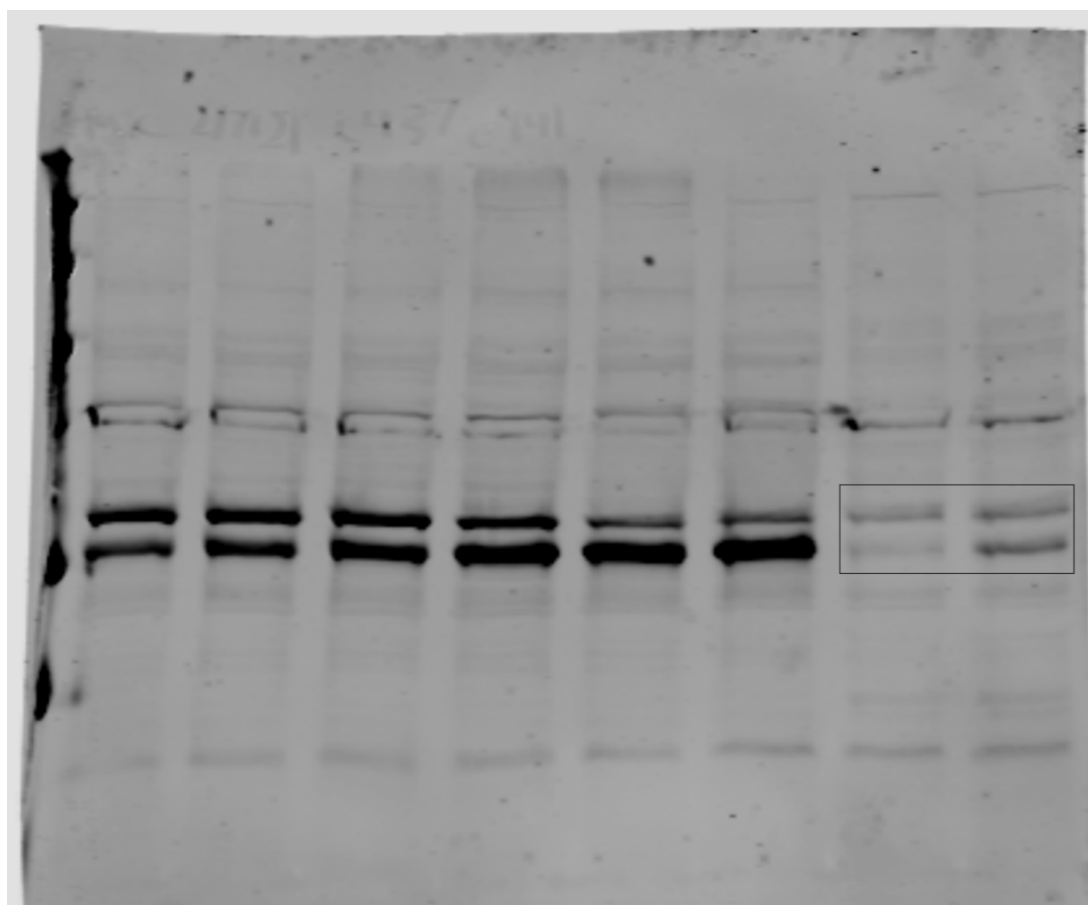

Figure 1—figure supplement 2F – MDA-MB-231 – HIF1 $\alpha$

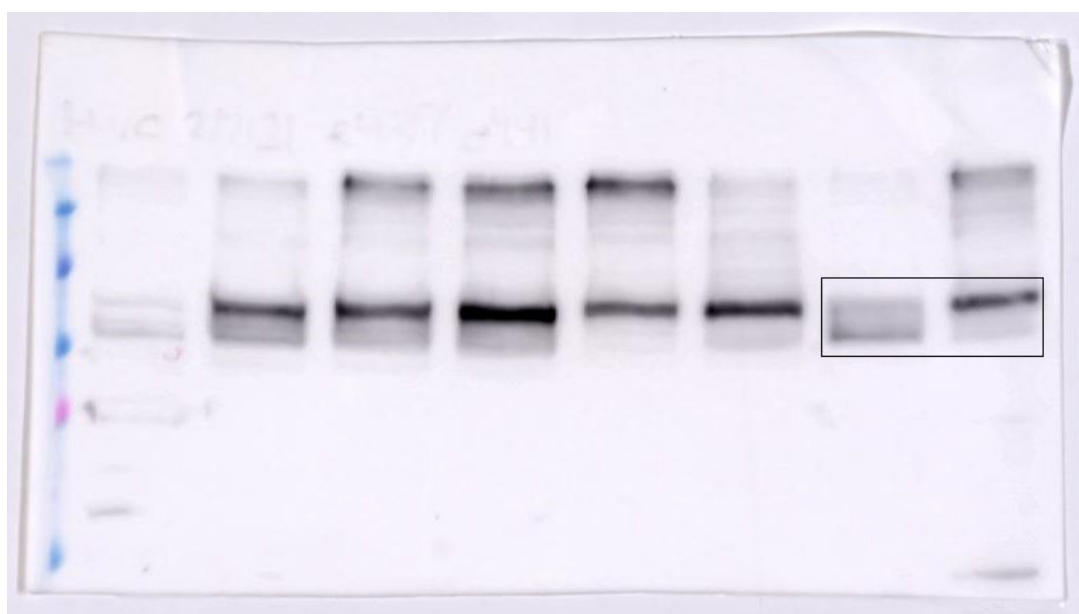

Figure 1—figure supplement 2F – MDA-MB-231 – GAPDH

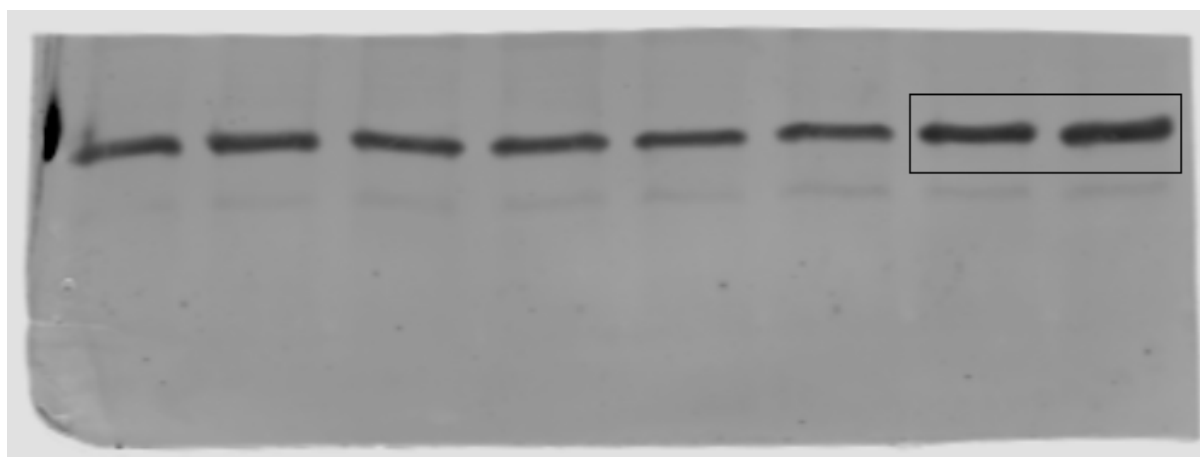

Supplement: fig1-figsupp2-data1 [file Figure 1-figure supplement 2-annotated source data.pdf › Figure 1-figure supplement 2-annotated source data.pdf]
