# Supplementary material for: Hypoxia truncates and constitutively activates the key cholesterol synthesis enzyme squalene monooxygenase
Source: eLife journal article supplement (doi:10.7554/elife.82843), 2022-12-13

Figure 1—figure supplement 3B – SM

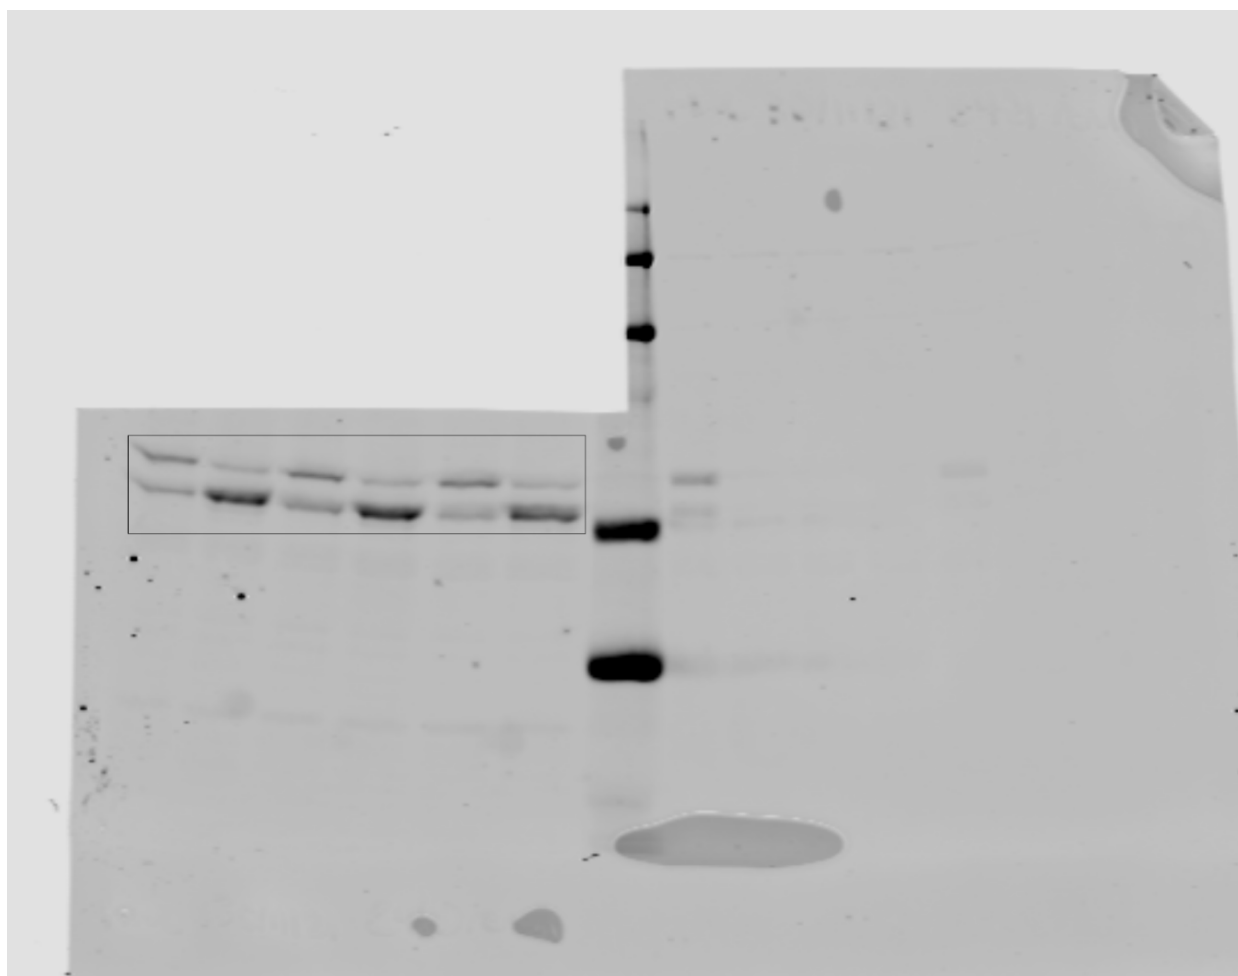

Figure 1—figure supplement 3B – HIF1 $\alpha$

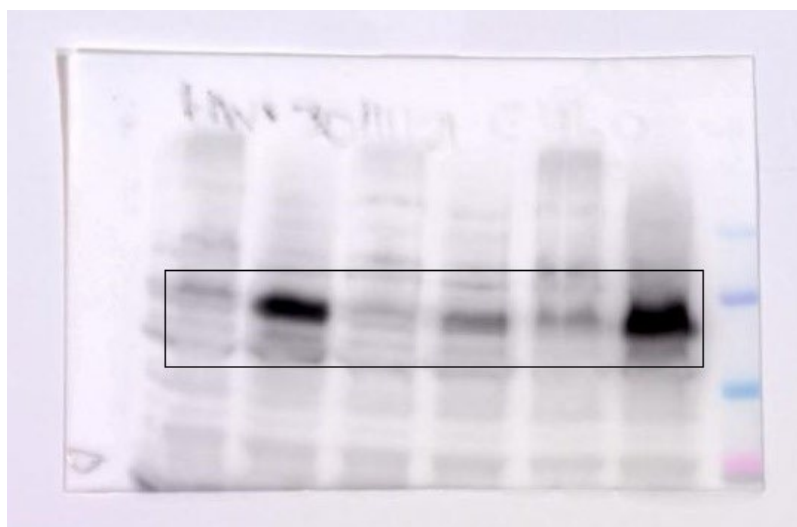

**Figure 1—figure supplement 3B – GAPDH**

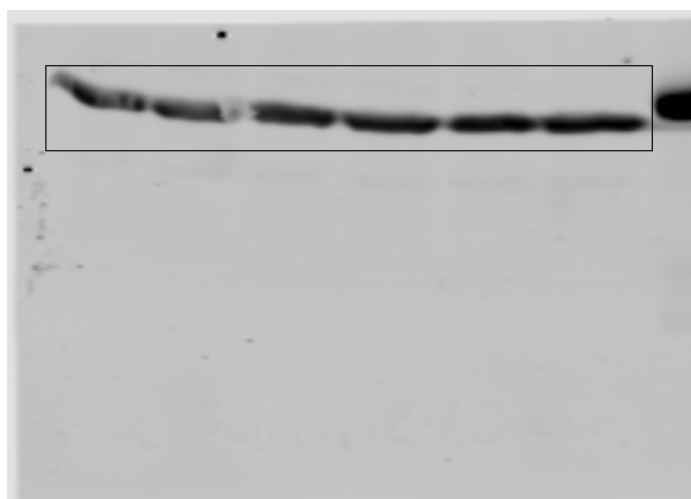

Supplement: fig1-figsupp3-data1 [file Figure 1-figure supplement 3-annotated source data.pdf › Figure 1-figure supplement 3-annotated source data.pdf]
