# Supplementary material for: Hypoxia truncates and constitutively activates the key cholesterol synthesis enzyme squalene monooxygenase
Source: eLife journal article supplement (doi:10.7554/elife.82843), 2022-12-13

Figure 3—figure supplement 1A – SM

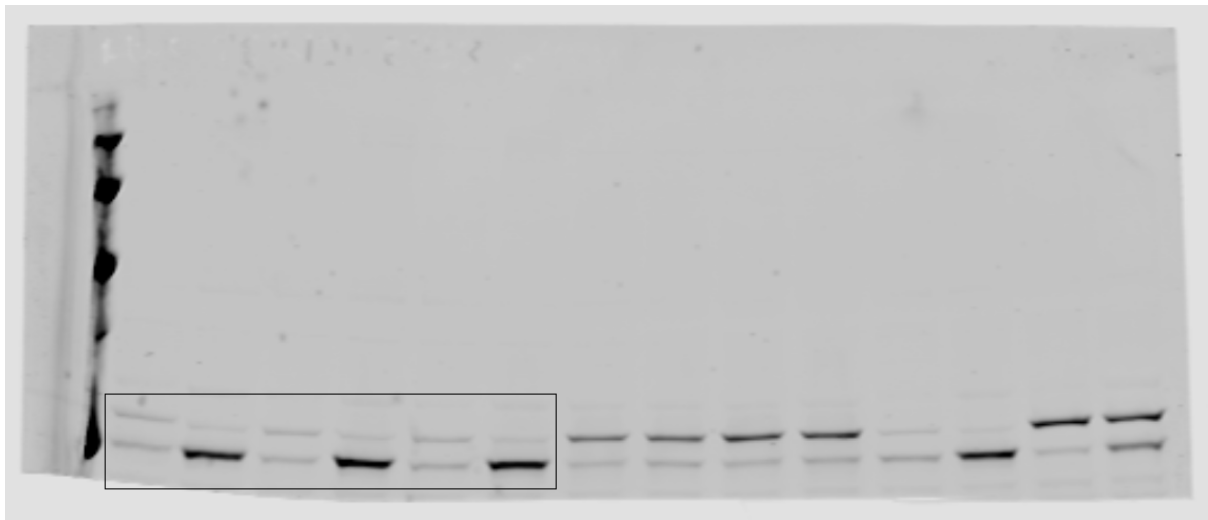

Figure 3—figure supplement 1A – V5

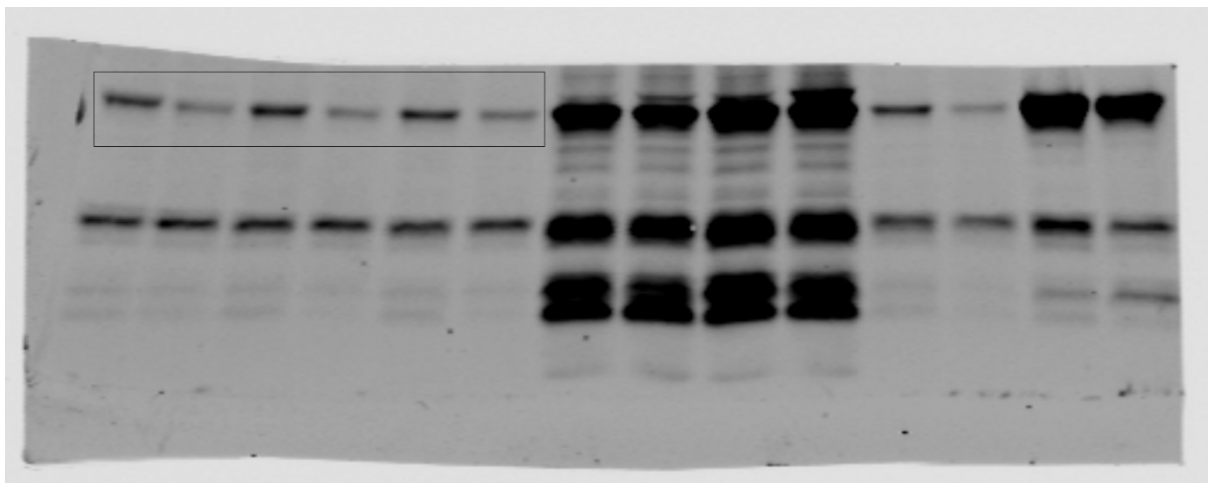

Figure 3—figure supplement 1A – HIF1 $\alpha$

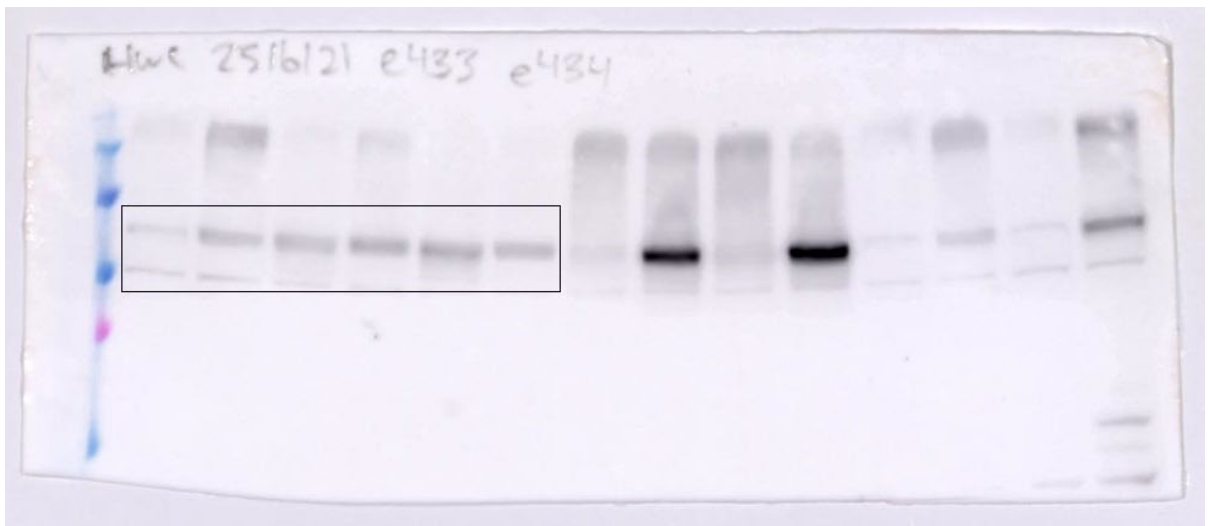

**Figure 3—figure supplement 1A – GAPDH**

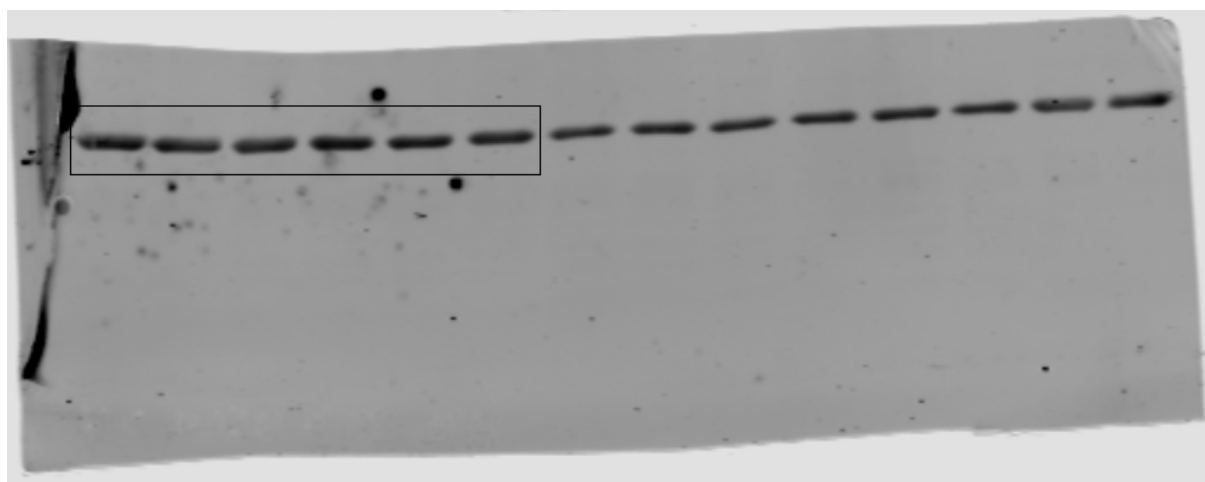

Supplement: fig3-figsupp1-data1 [file Figure 3-figure supplement 1-annotated source data.pdf › Figure 3-figure supplement 1-annotated source data.pdf]
