# Supplementary material for: Hypoxia truncates and constitutively activates the key cholesterol synthesis enzyme squalene monooxygenase
Source: eLife journal article supplement (doi:10.7554/elife.82843), 2022-12-13

**Figure 4—figure supplement 2B – SM**

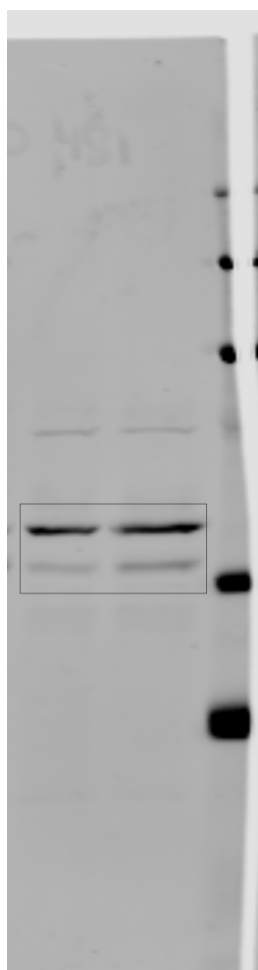

**Figure 4—figure supplement 2B – GAPDH**

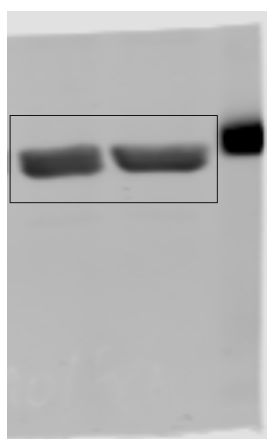

**Figure 4—figure supplement 2C – SM**

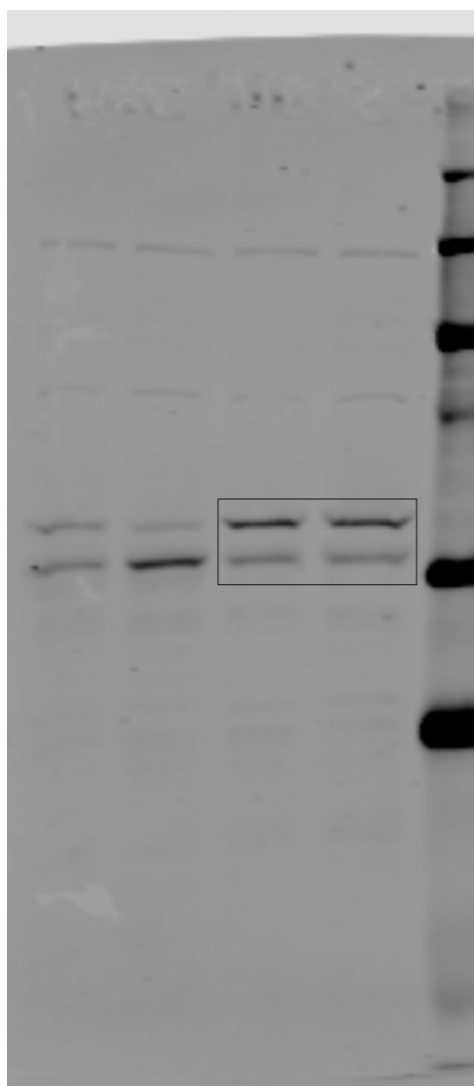

**Figure 4—figure supplement 2C – GAPDH**

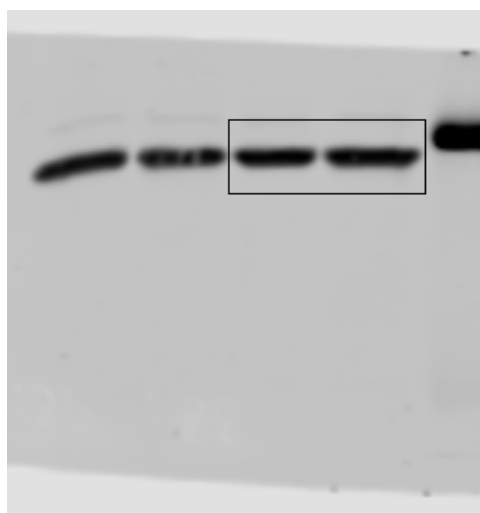

**Figure 4—figure supplement 2D – V5**

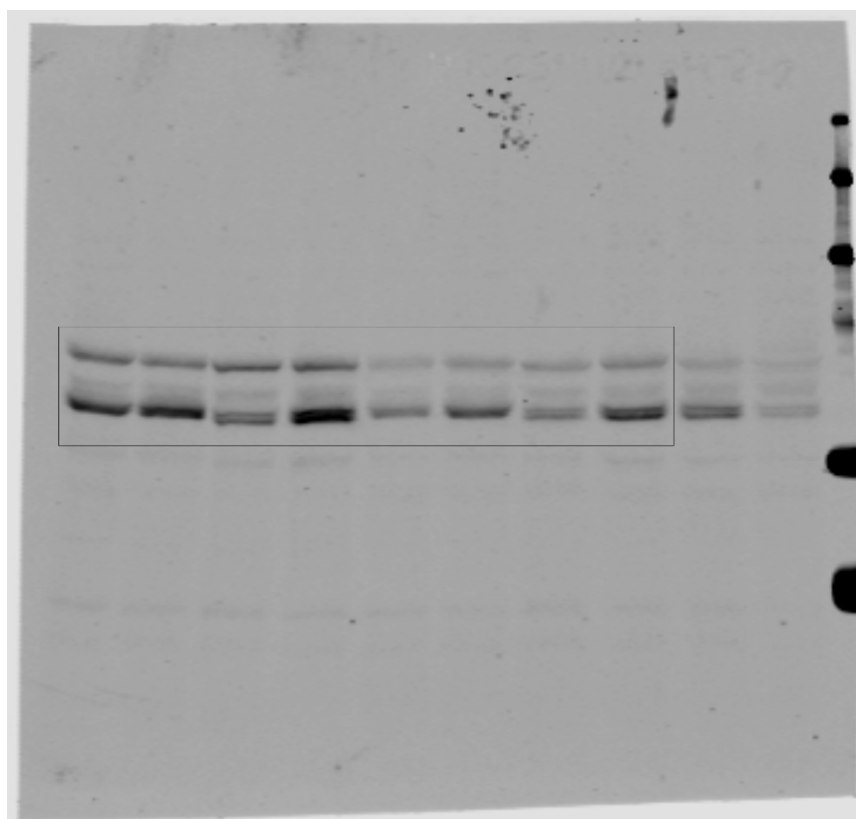

**Figure 4—figure supplement 2D – GAPDH**

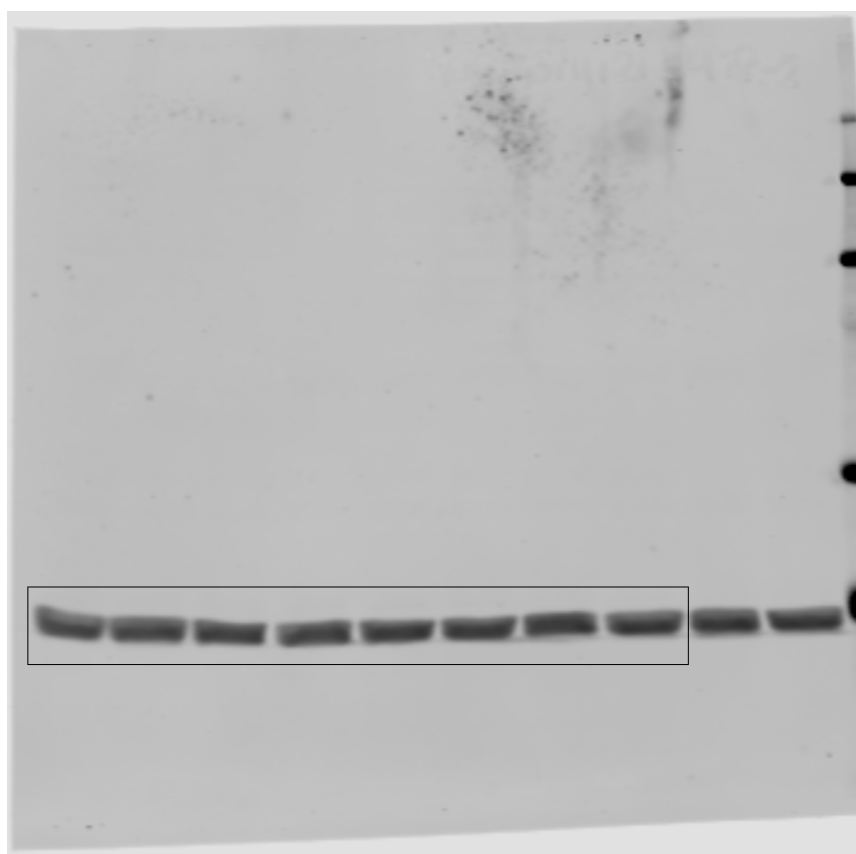

**Figure 4—figure supplement 2E – SM**

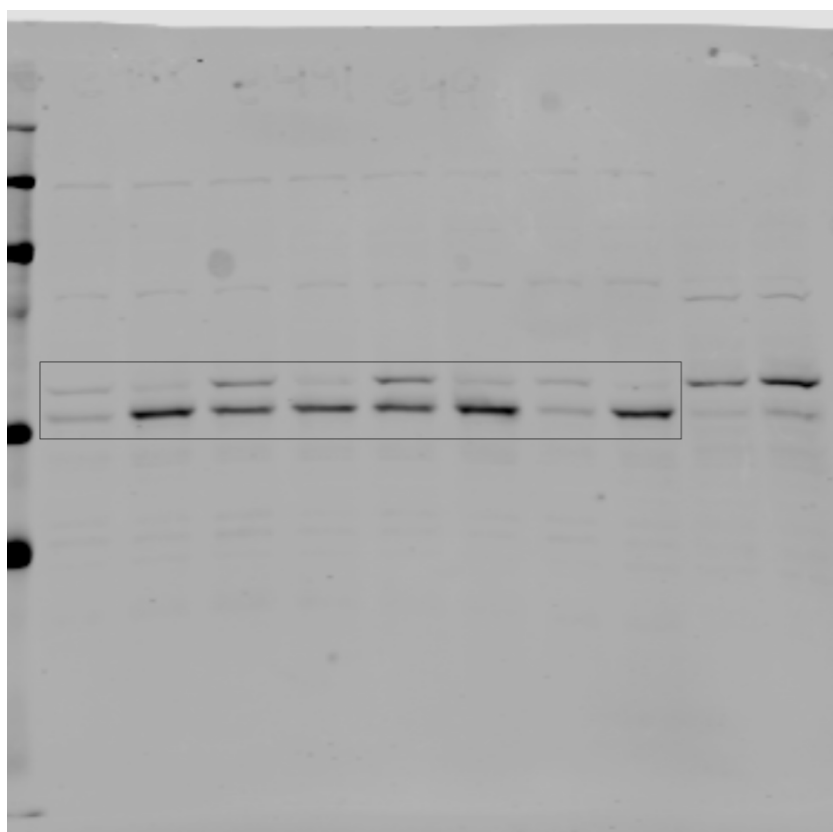

**Figure 4—figure supplement 2E – V5**

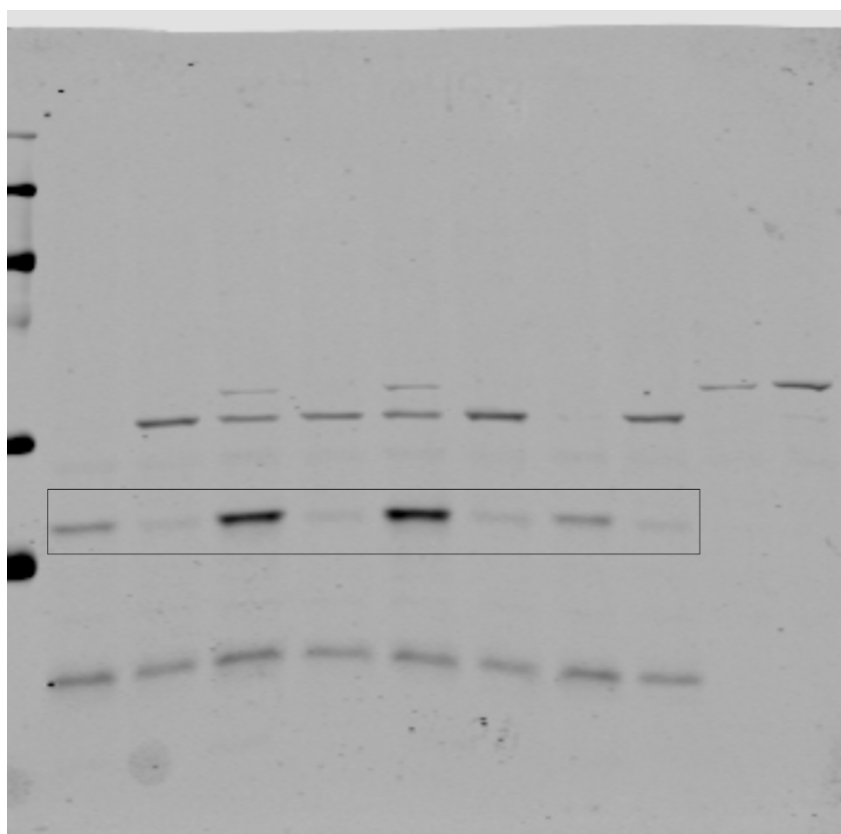

Figure 4—figure supplement 2E – GAPDH

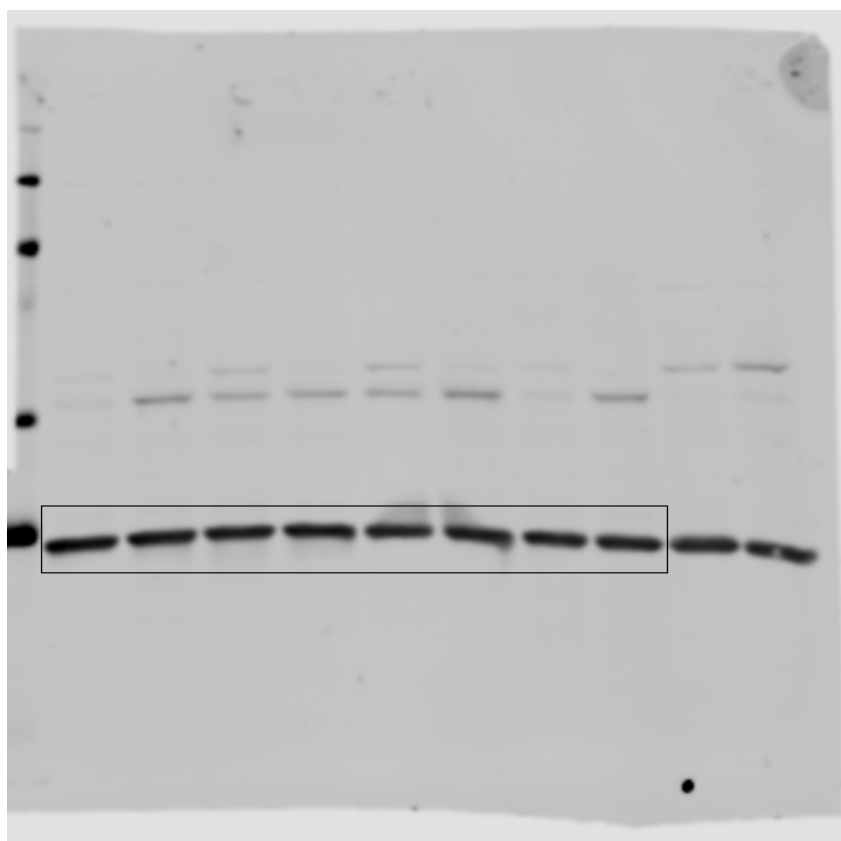

Supplement: fig4-figsupp2-data1 [file Figure 4-figure supplement 2-annotated source data.pdf › Figure 4-figure supplement 2-annotated source data.pdf]
