# Supplementary material for: Hypoxia truncates and constitutively activates the key cholesterol synthesis enzyme squalene monooxygenase
Source: eLife. 2023 Jan 19;12:e82843. doi: 10.7554/eLife.82843 (PMC9851614; doi:10.7554/eLife.82843)
Supplement: Figure 1—source data 1. [file elife-82843-fig1-data1.zip]

Archive with 56 entries (55 files):
- Annotated/
- Annotated/Fig. 1B GAPDH.tif
- Annotated/Fig. 1B HIF1a.jpg
- Annotated/Fig. 1B SM.tif
- Annotated/Fig. 1C GAPDH.tif
- Annotated/Fig. 1C HIF1a.jpg
- Annotated/Fig. 1C SM.tif
- Annotated/Fig. 1D-0.5% GAPDH.tif
- Annotated/Fig. 1D-0.5% HIF1a.jpg
- Annotated/Fig. 1D-0.5% SM.tif
- Annotated/Fig. 1D-1% GAPDH.tif
- Annotated/Fig. 1D-1% HIF1a.jpg
- Annotated/Fig. 1D-1% SM.tif
- Annotated/Fig. 1D-10% GAPDH.tif
- Annotated/Fig. 1D-10% HIF1a.jpg
- Annotated/Fig. 1D-10% SM.tif
- Annotated/Fig. 1D-2% GAPDH.tif
- Annotated/Fig. 1D-2% HIF1a.jpg
- Annotated/Fig. 1D-2% SM.tif
- Annotated/Fig. 1D-3% GAPDH.tif
- Annotated/Fig. 1D-3% HIF1a.jpg
- Annotated/Fig. 1D-3% SM.tif
- Annotated/Fig. 1D-4% GAPDH.tif
- Annotated/Fig. 1D-4% HIF1a.jpg
- Annotated/Fig. 1D-4% SM.tif
- Annotated/Fig. 1D-5% GAPDH.tif
- Annotated/Fig. 1D-5% HIF1a.jpg
- Annotated/Fig. 1D-5% SM.tif
- Fig. 1B GAPDH.tif
- Fig. 1B HIF1a.jpg
- Fig. 1B SM.tif
- Fig. 1C GAPDH.tif
- Fig. 1C HIF1a.jpg
- Fig. 1C SM.tif
- Fig. 1D-0.5% GAPDH.tif
- Fig. 1D-0.5% HIF1a.jpg
- Fig. 1D-0.5% SM.tif
- Fig. 1D-1% GAPDH.tif
- Fig. 1D-1% HIF1a.jpg
- Fig. 1D-1% SM.tif
- Fig. 1D-10% GAPDH.tif
- Fig. 1D-10% HIF1a.jpg
- Fig. 1D-10% SM.tif
- Fig. 1D-2% GAPDH.tif
- Fig. 1D-2% HIF1a.jpg
- Fig. 1D-2% SM.tif
- Fig. 1D-3% GAPDH.tif
- Fig. 1D-3% HIF1a.jpg
- Fig. 1D-3% SM.tif
- Fig. 1D-4% GAPDH.tif
- Fig. 1D-4% HIF1a.jpg
- Fig. 1D-4% SM.tif
- Fig. 1D-5% GAPDH.tif
- Fig. 1D-5% HIF1a.jpg
- Fig. 1D-5% SM.tif
- Figure 1-annotated source data.pdf
