# Supplementary figures and images for: Hypoxia truncates and constitutively activates the key cholesterol synthesis enzyme squalene monooxygenase
Source: eLife journal article supplement (doi:10.7554/elife.82843), 2022-12-13

**Figure 2B – V5**

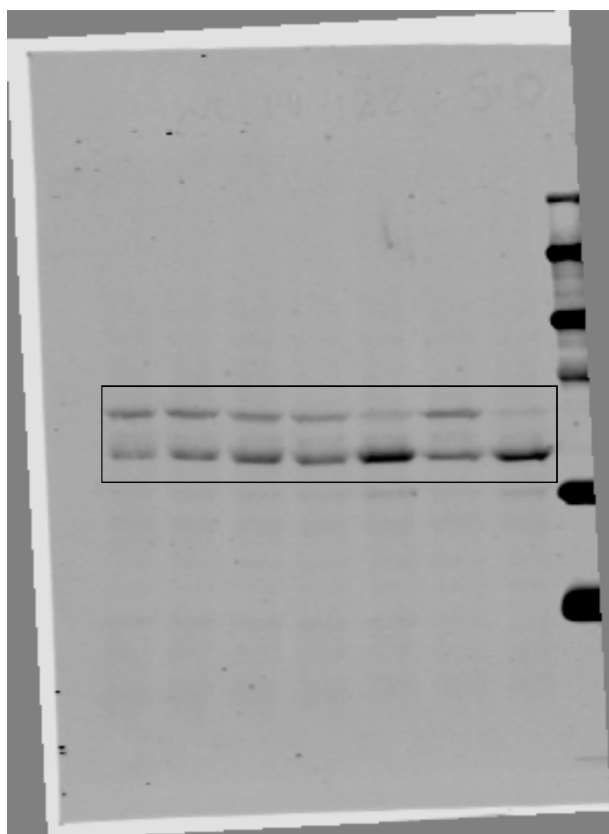

**Figure 2B – GAPDH**

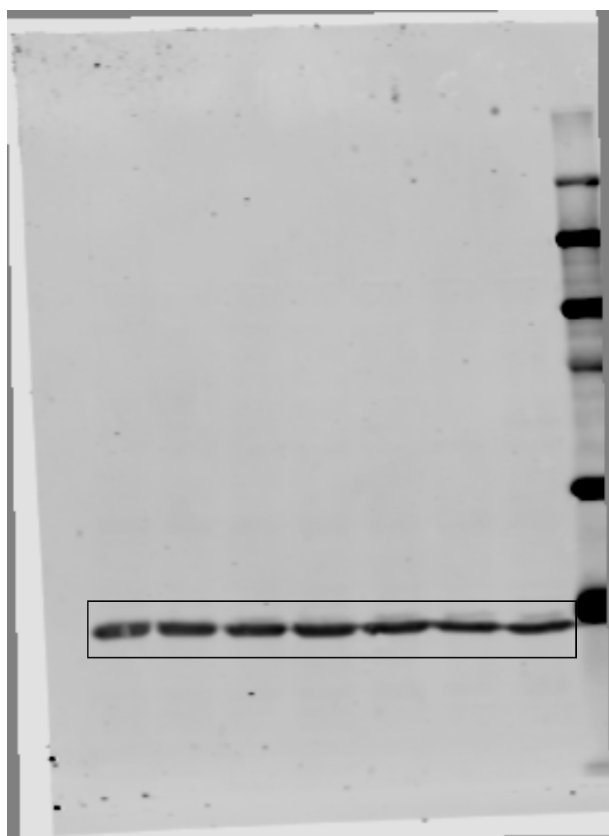

**Figure 2C – SM**

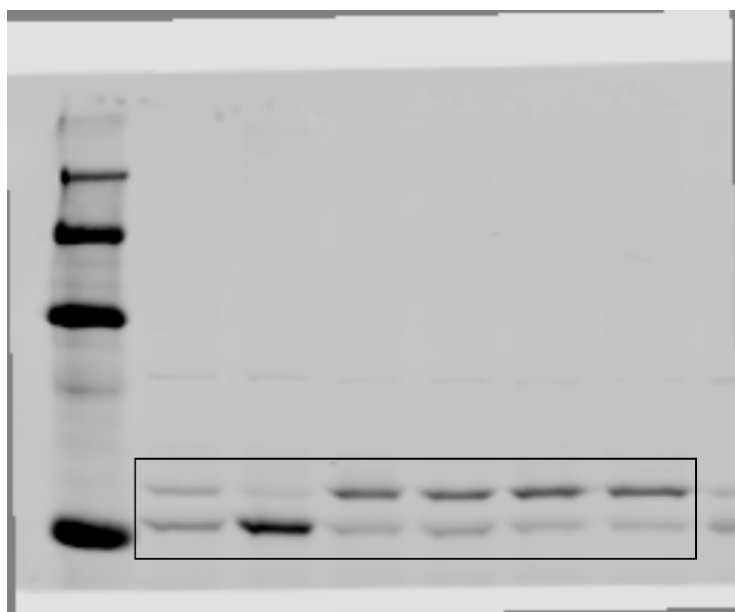

**Figure 2C – V5**

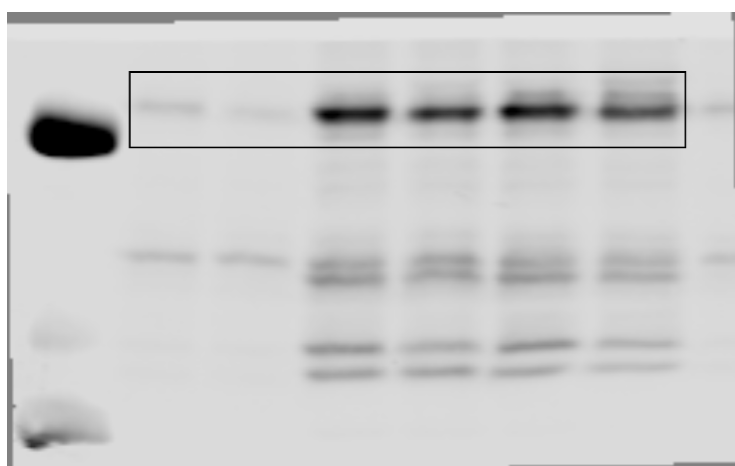

**Figure 2C – GAPDH**

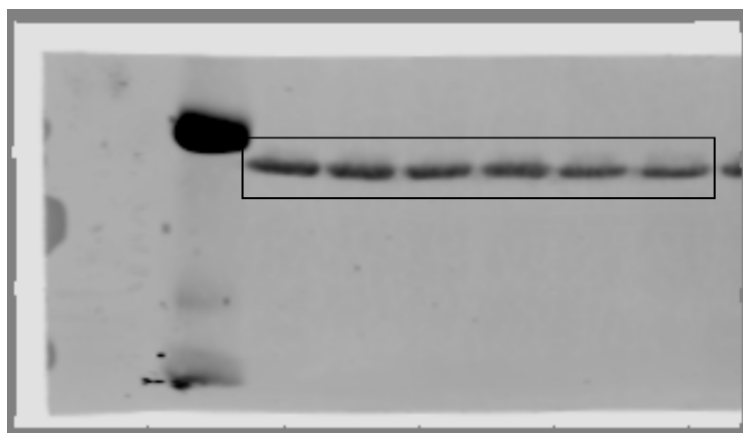

**Figure 2D – V5**

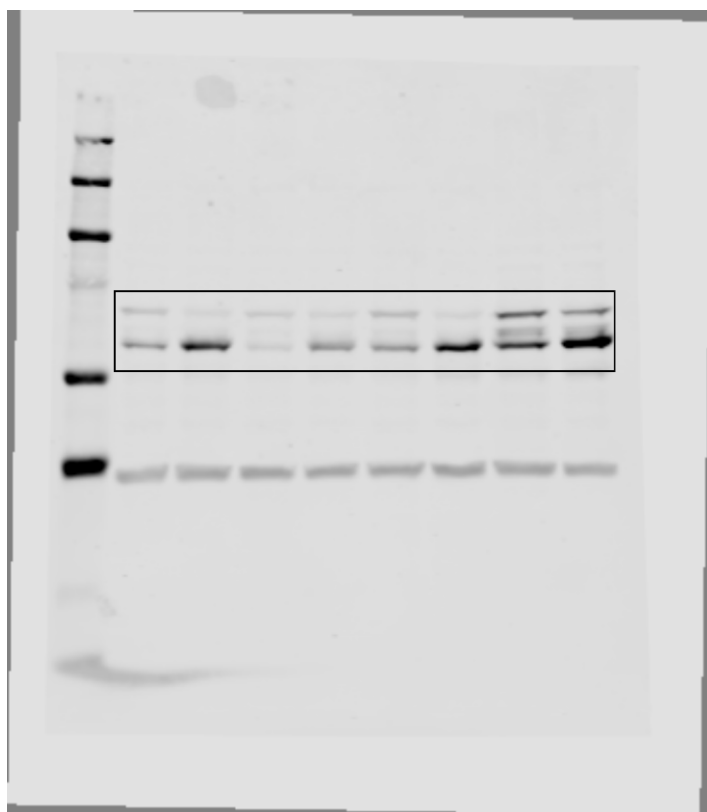

**Figure 2D – GAPDH**

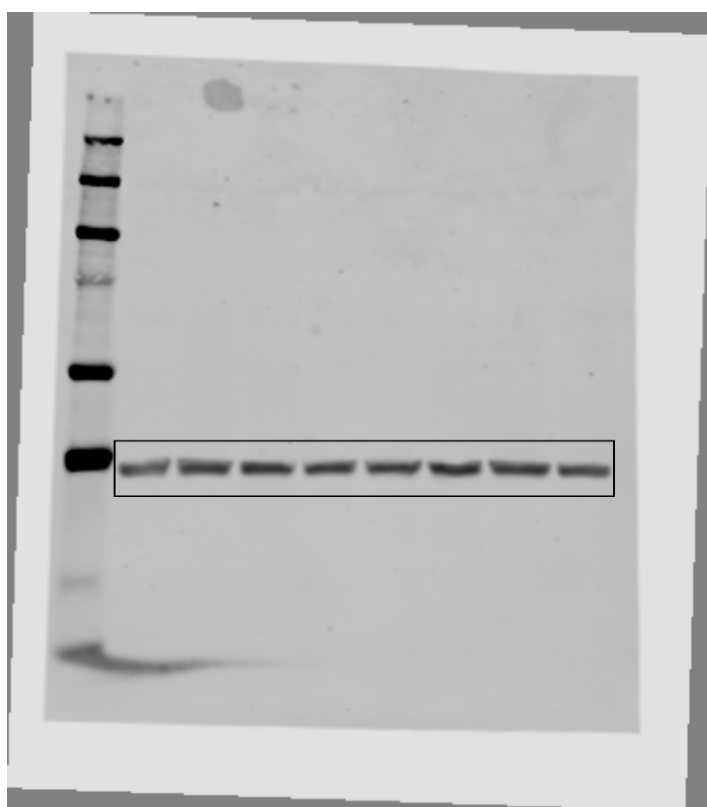

Supplement: fig2-data1 [file Figure 2-annotated source data.pdf › Figure 2-annotated source data.pdf]

**Figure 3A – SM**

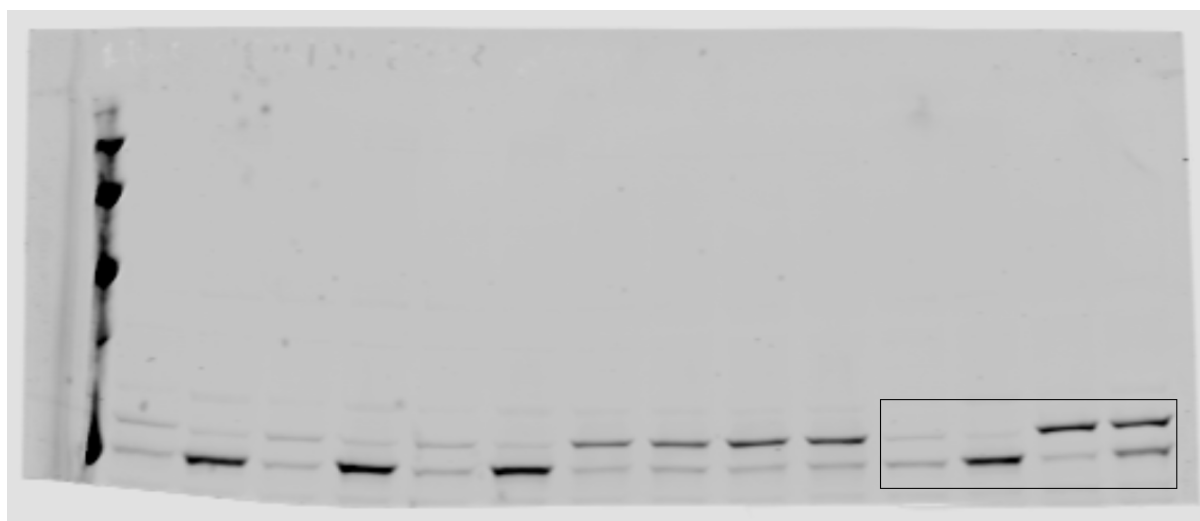

**Figure 3A – V5**

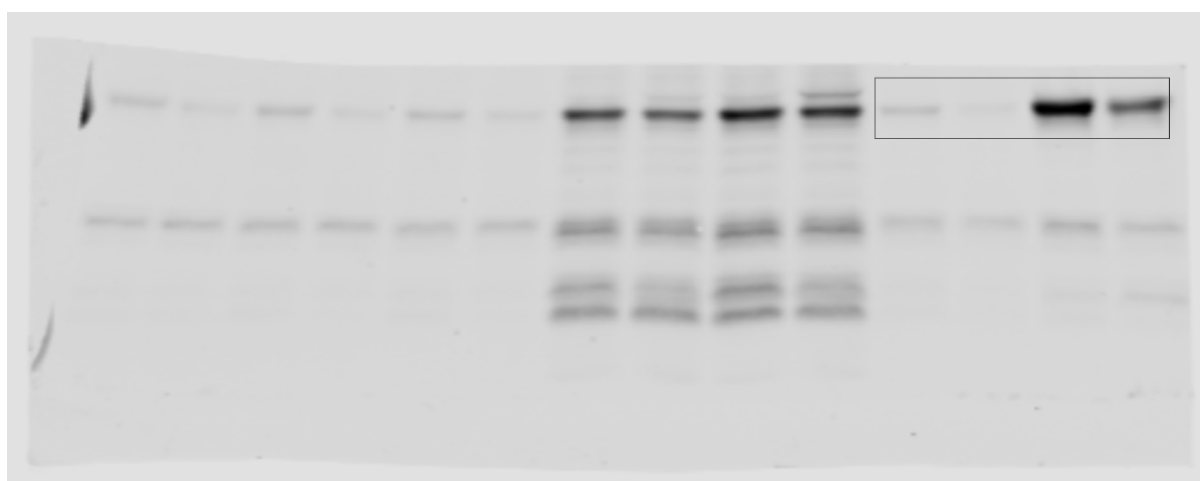

**Figure 3A – GAPDH**

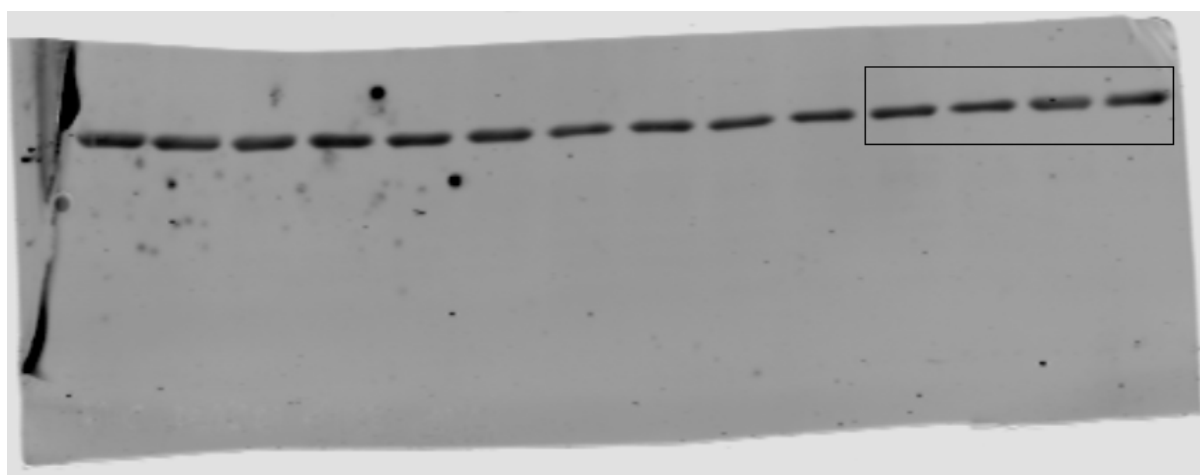

**Figure 3B – V5**

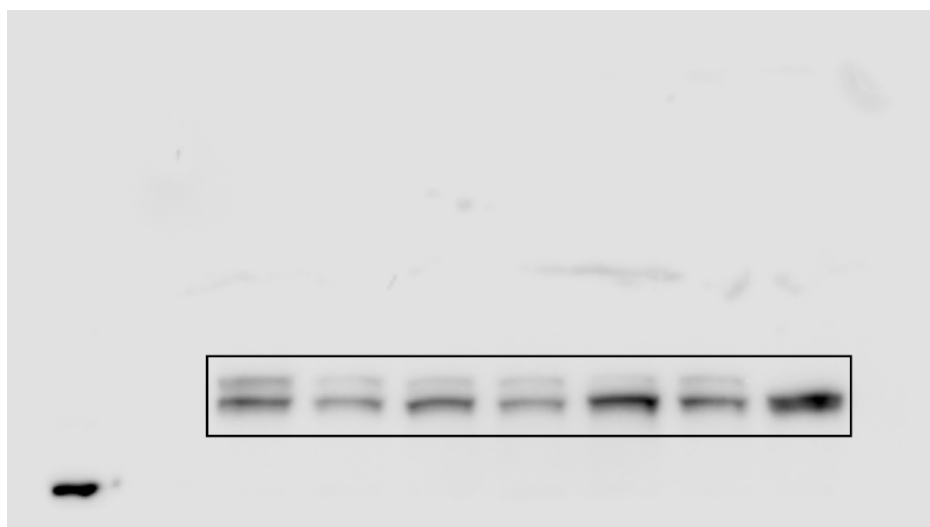

**Figure 3B – SM**

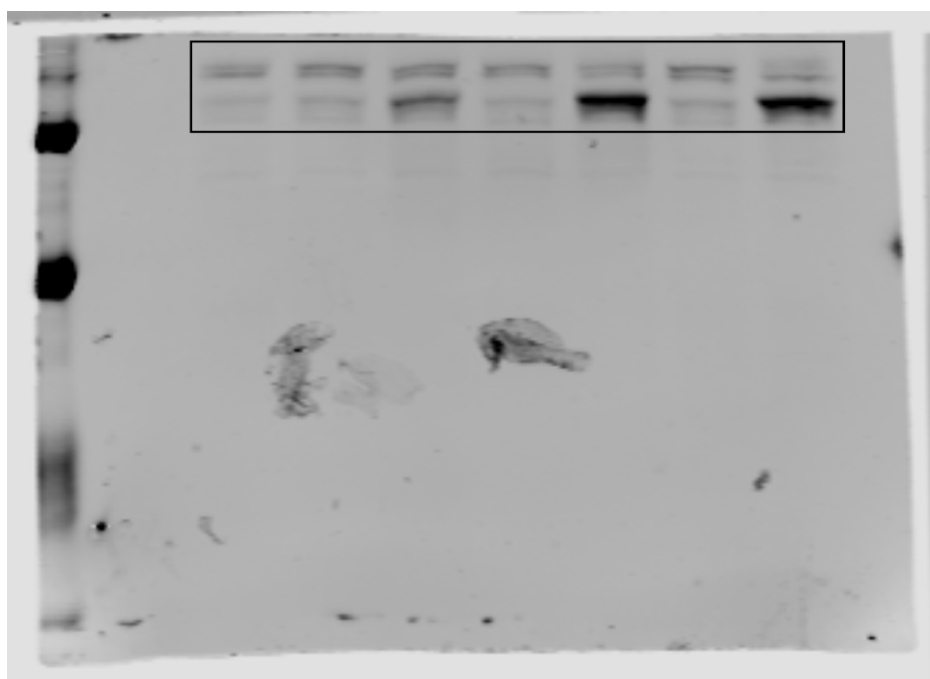

**Figure 3B – HIF1 $\alpha$**

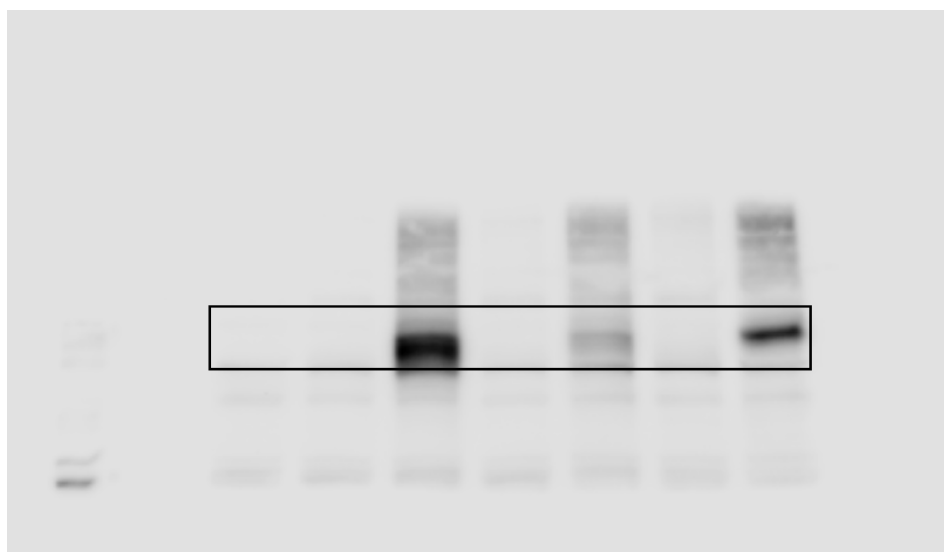

**Figure 3B – GAPDH**

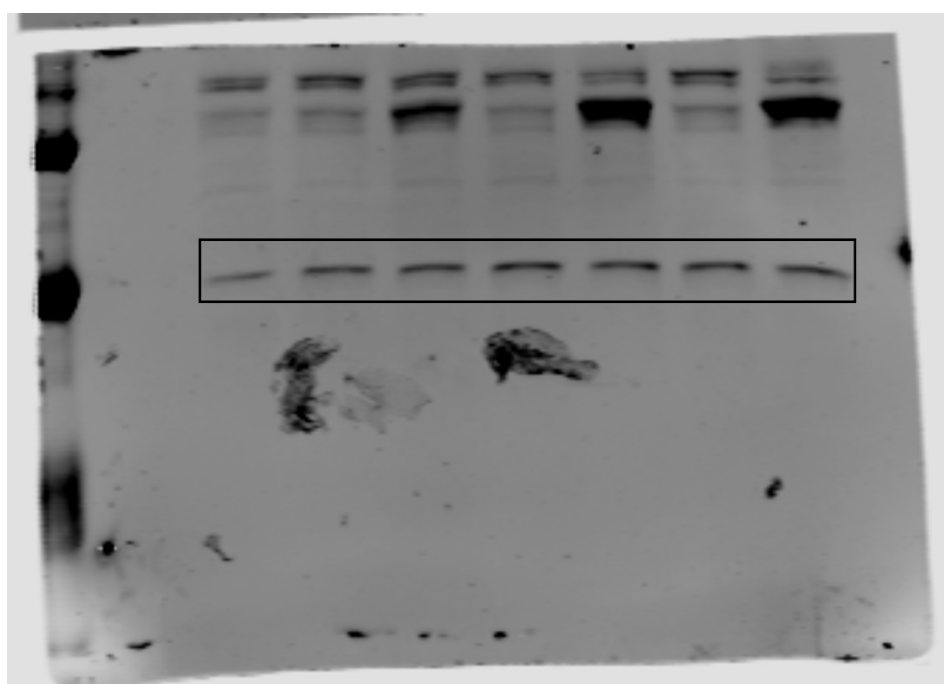

Supplement: fig3-data1 [file Figure 3-annotated source data.pdf › Figure 3-annotated source data.pdf]

**Figure 4A – SM**

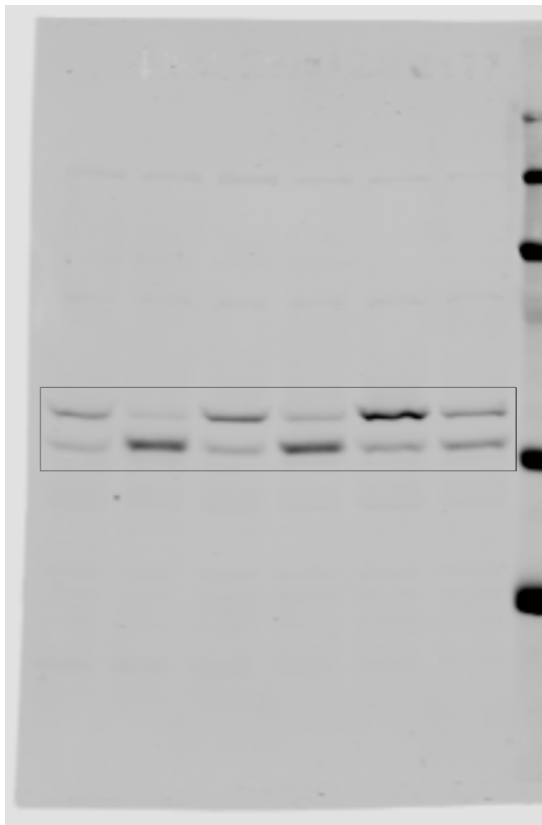

**Figure 4A – GAPDH**

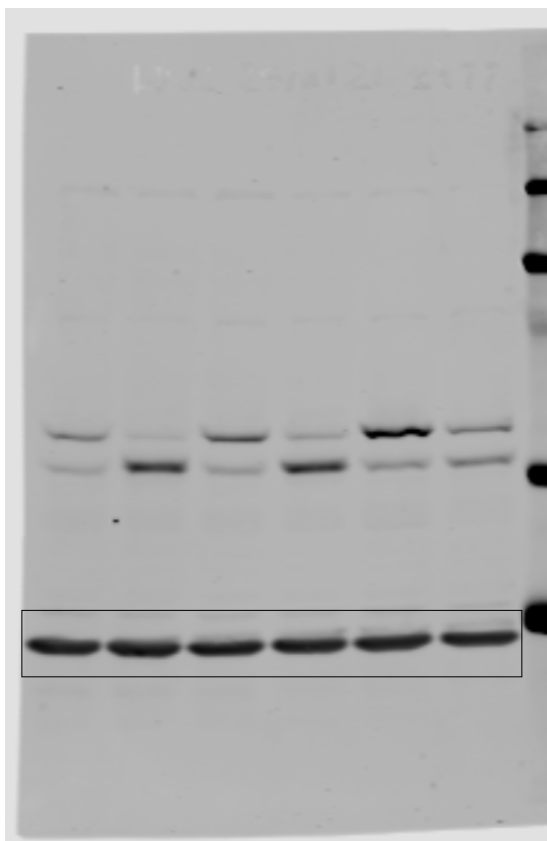

**Figure 4D – SM**

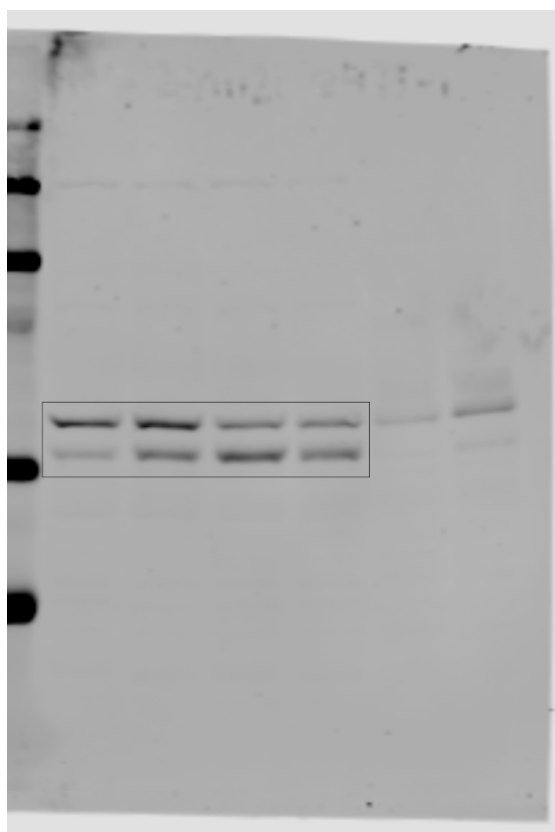

**Figure 4D – GAPDH**

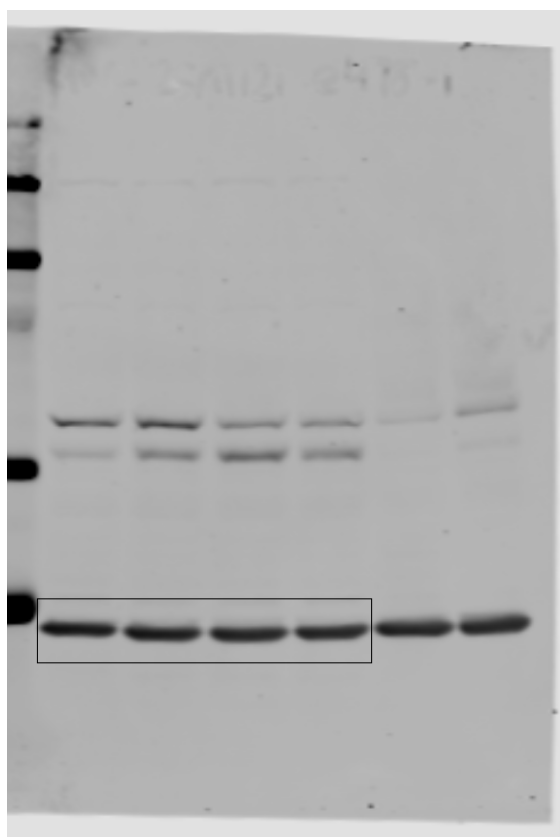

**Figure 4E – V5**

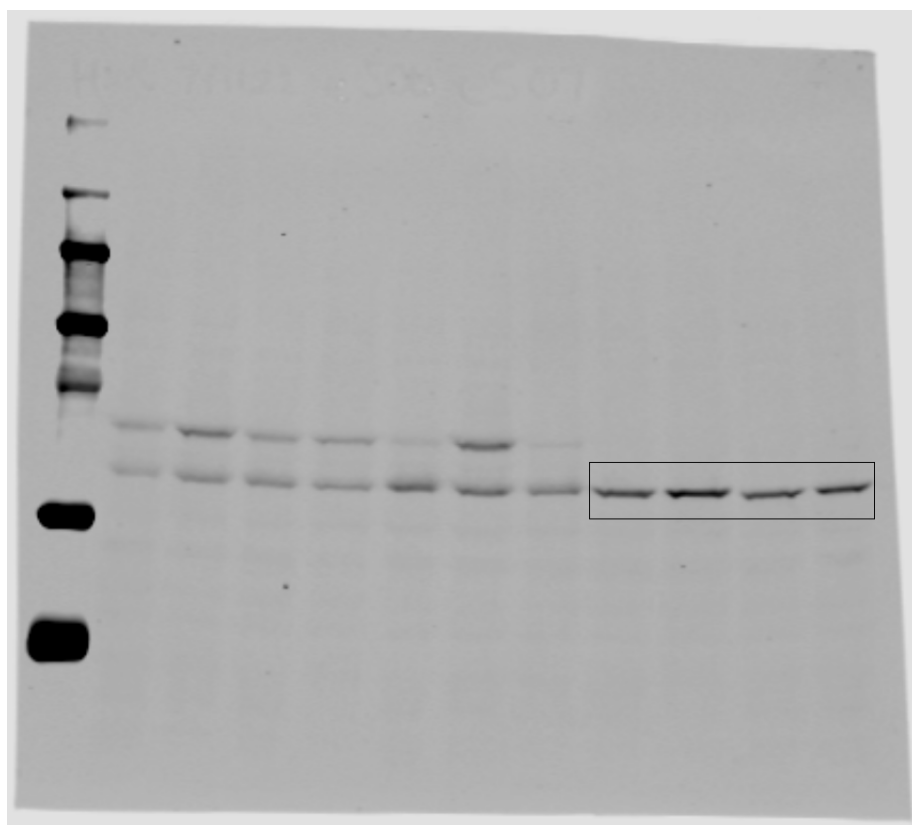

**Figure 4E – GAPDH**

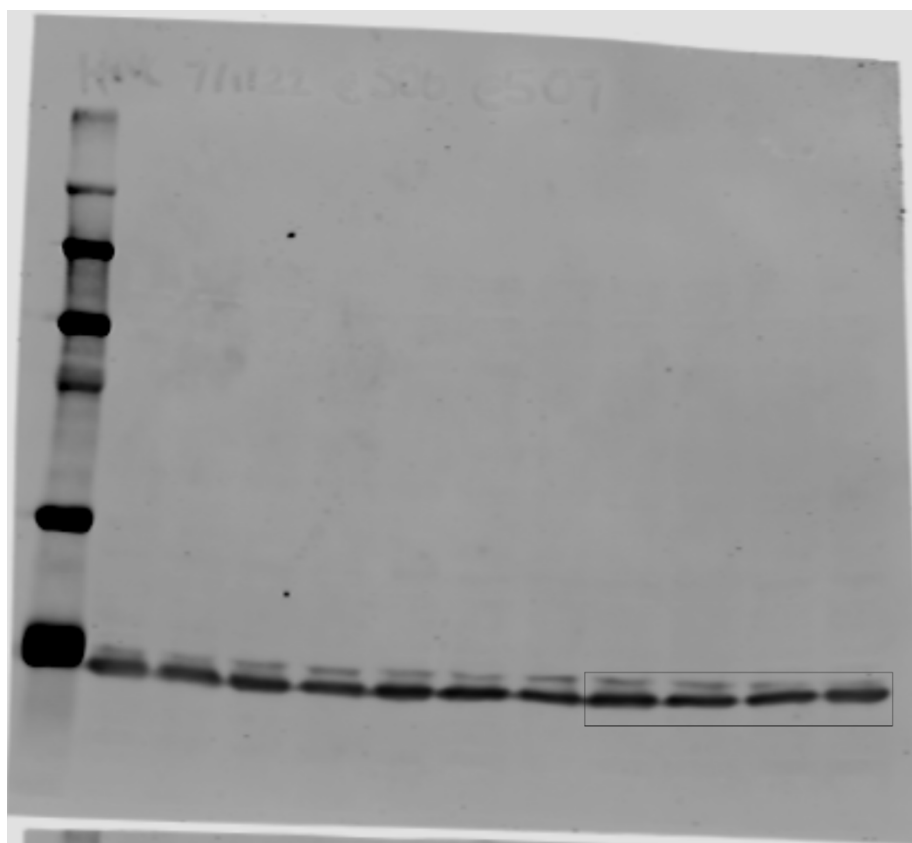

Supplement: fig4-data1 [file elife-82843-fig4-data1-v1.zip]

**Figure 4—figure supplement 3C – SM**

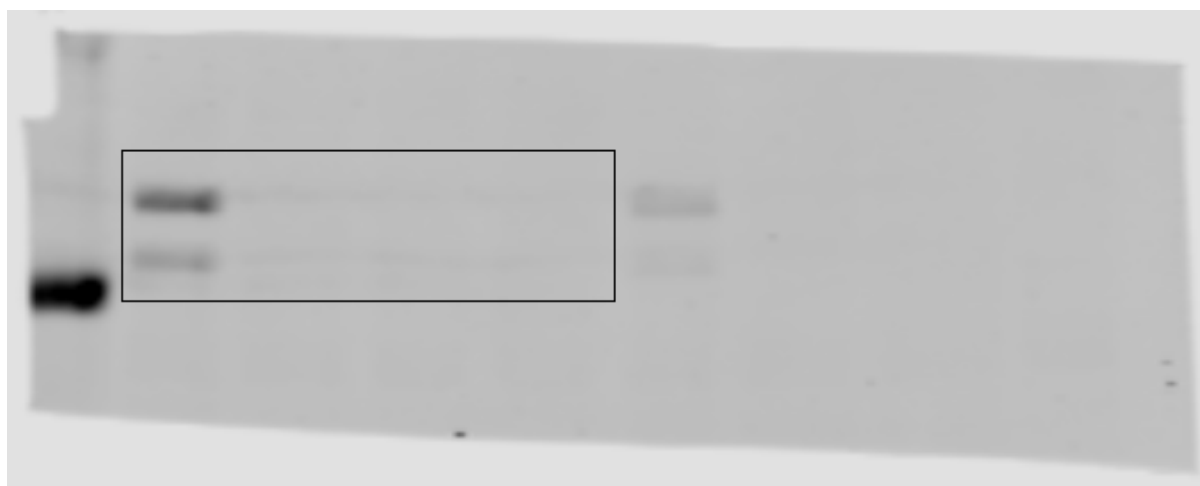

**Figure 4—figure supplement 3C – GAPDH**

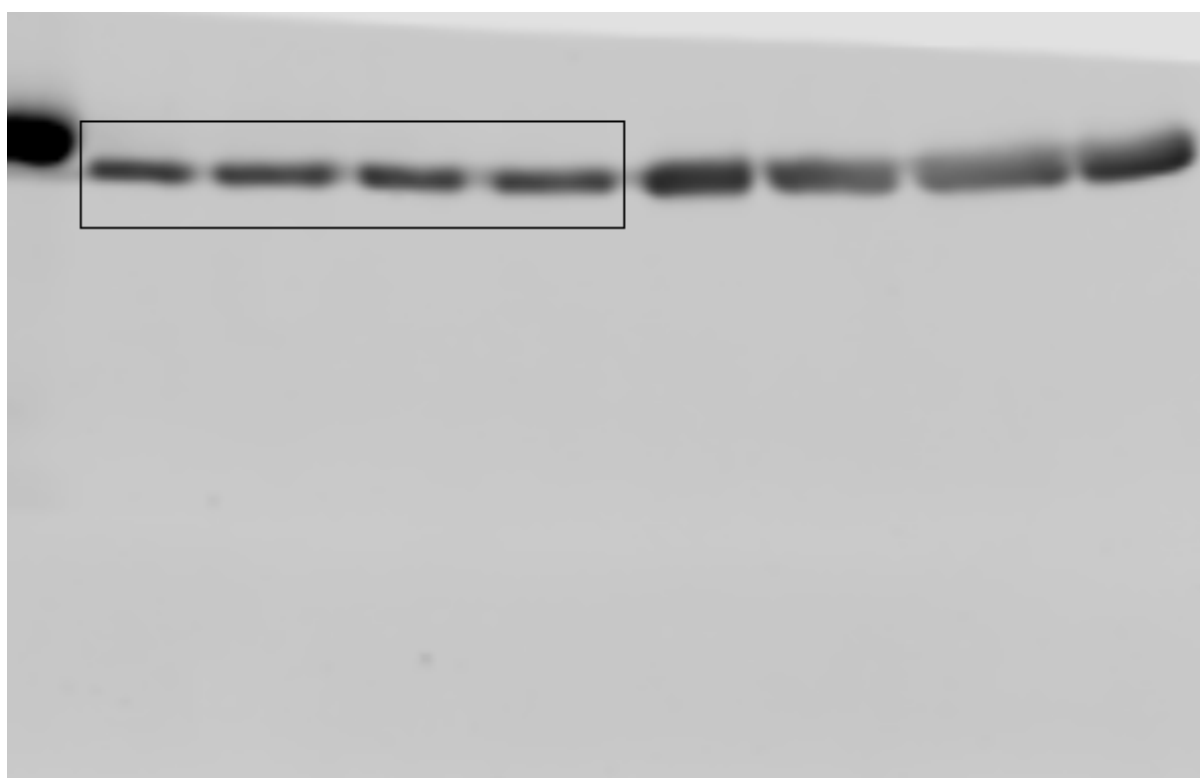

Supplement: fig4-figsupp3-data1 [file Figure 4-figure supplement 3-annotated source data.pdf › Figure 4-figure supplement 3-annotated source data.pdf]

Figure 4—figure supplement 4 – V5

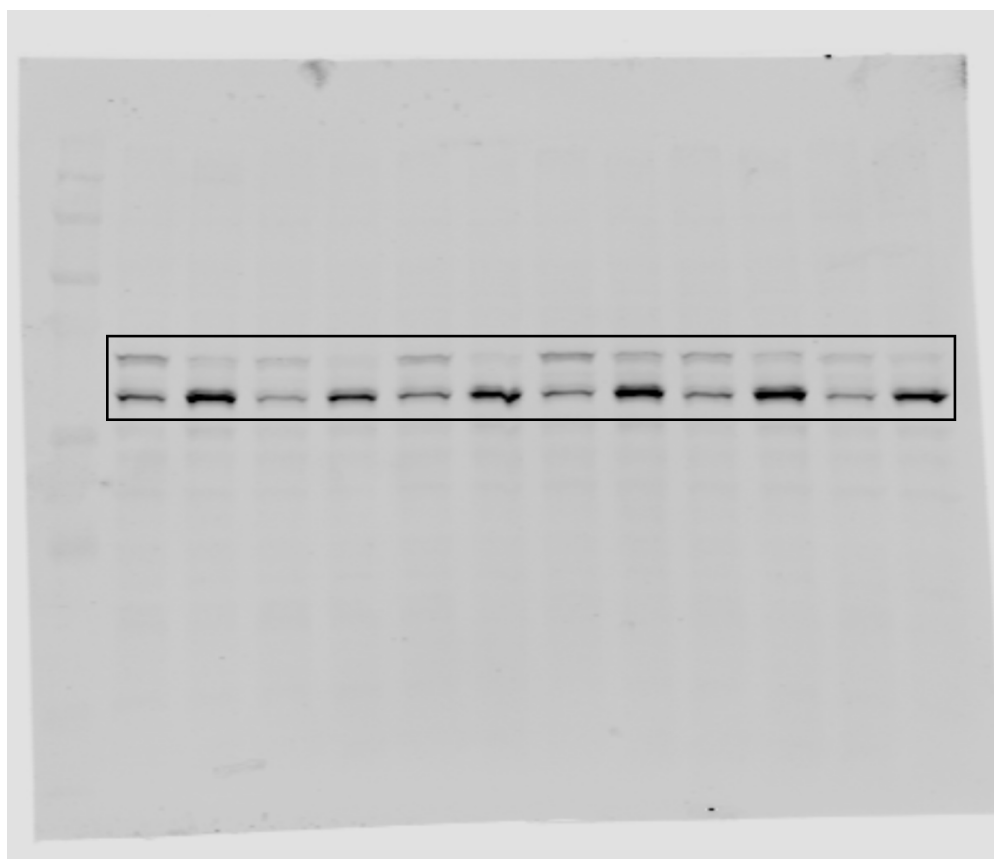

Figure 4—figure supplement 4 – GAPDH

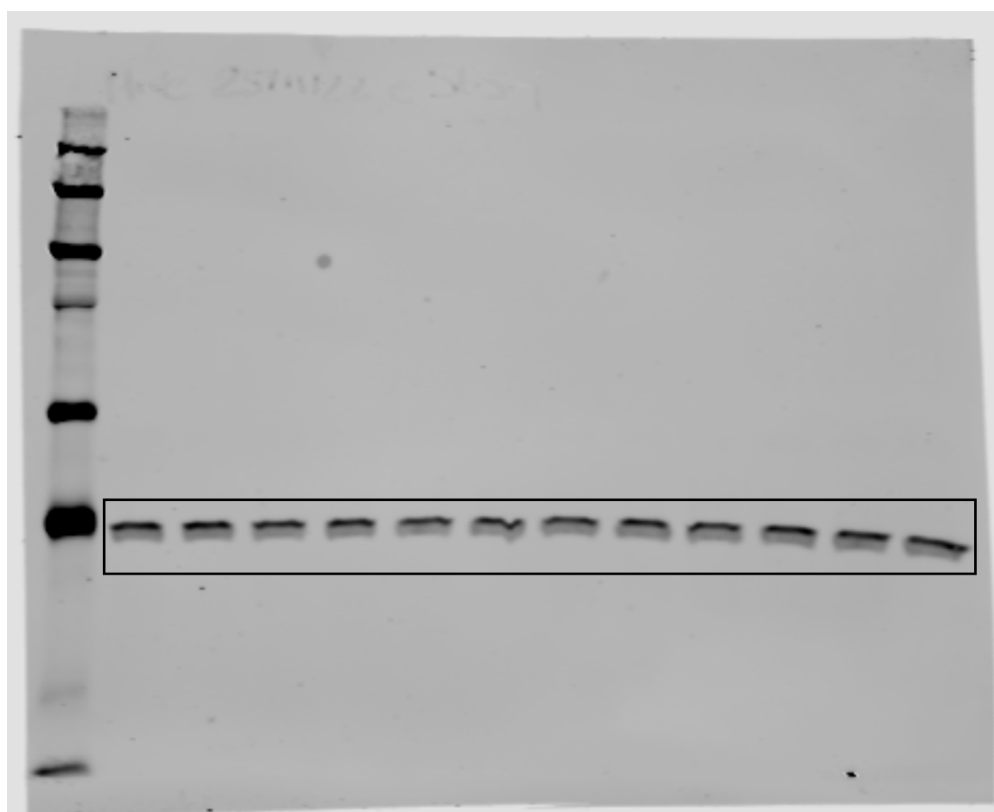

Supplement: fig4-figsupp4-data1 [file Figure 4-figure supplement 4-annotated source data.pdf › Figure 4-figure supplement 4-annotated source data.pdf]

**Figure 5**

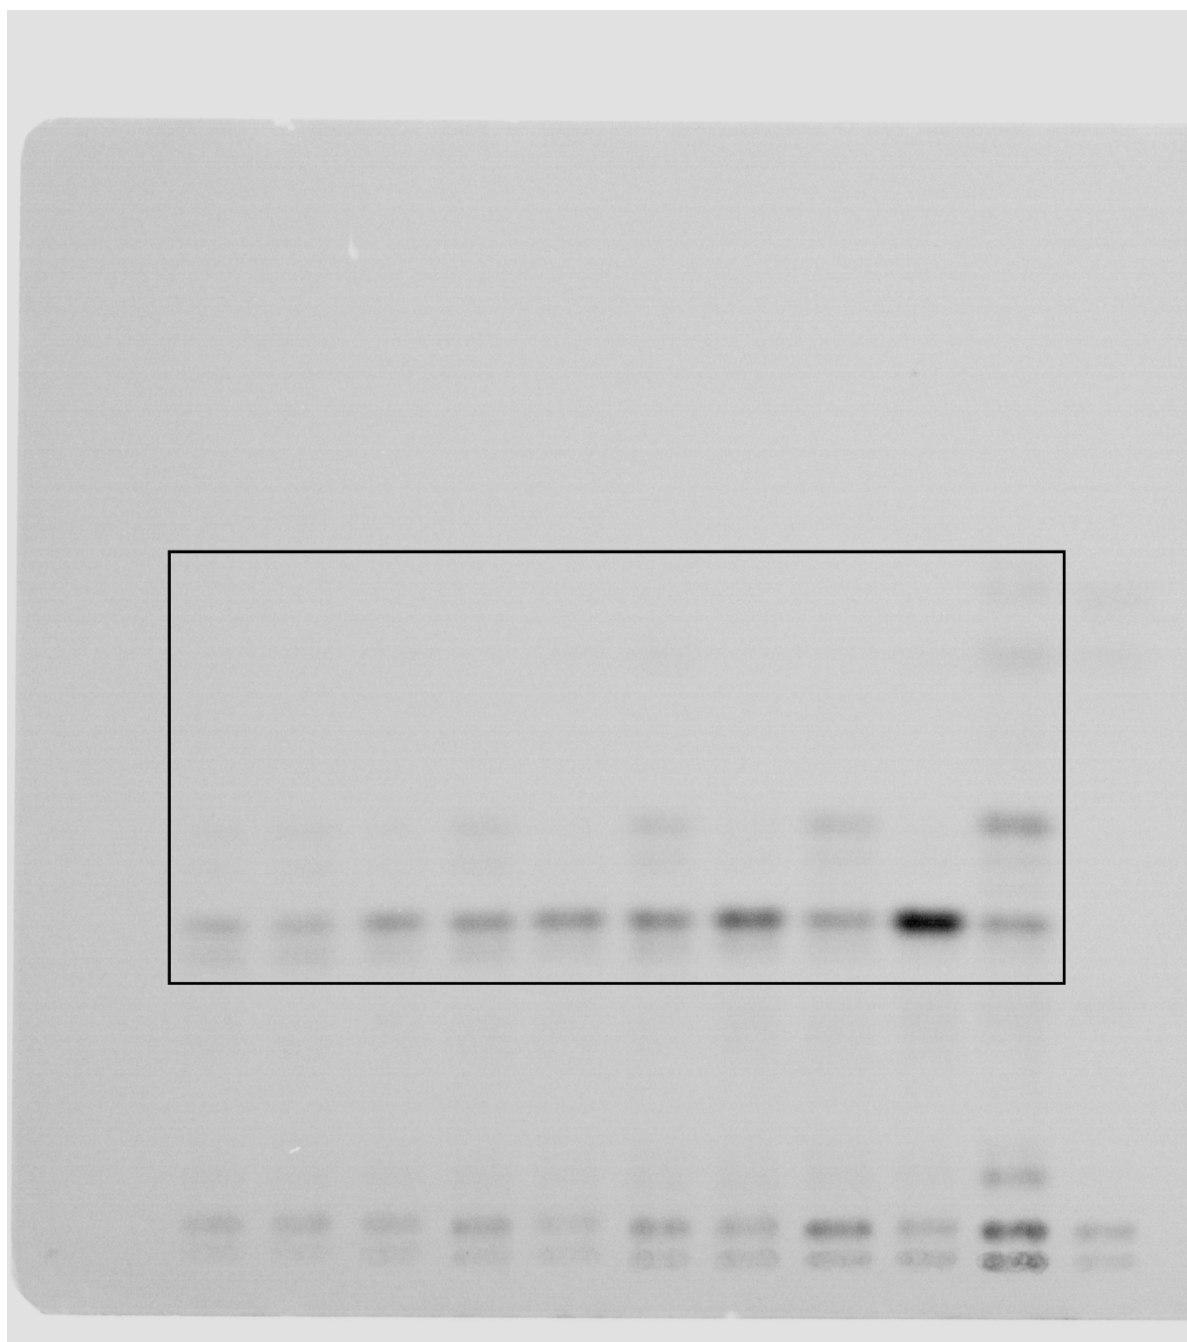

Supplement: fig5-data1 [file Figure 5-annotated source data.pdf › Figure 5-annotated source data.pdf]
